# Supplementary material for: Versatile ruthenium complexes based on 2,2′-bipyridine modified peptoids
Source: Royal Society of Chemistry journal article supplement (doi:10.1039/c6cc04346a), 2016-01-01
Supplement: c6cc04346a1.pdf [file c6cc04346a1.pdf]

# Versatile Ruthenium Complexes Based on 2,2'-Bipyridine Modified Peptoids

Maria Baskin, Larisa Panz and Galia Maayan

*Schulich Faculty of Chemistry, Technion- Israel Institute of Technology, Haifa, Israel, 32000*

## Materials:

Rink Amide resin was supplied by Novabiochem; Trifluoroacetic acid (TFA) was supplied by Alfa Aesar; Benzylamine, (S)-(-)-1-Phenylethylamine (Nspe) and (R)-(+)-1-Phenylethylamine (Nrpe) were supplied by Acros; Bromoacetic acid was supplied by MERCK; N,N'-diisopropylcarbodiimide (DIC), piperidine, 6-Bromo-2,2'-bipyridine, Ruthenium(III) chloride hydrate, acetonitrile (ACN) and water HPLC grade solvents were supplied by Sigma-Aldrich; dimethylformamide (DMF) and dichloromethane (DCM) solvents were supplied by Bio-Lab Ltd; Ethyl alcohol absolute was purchased from Carlo Erba; Ru(bipy)<sub>3</sub>PF<sub>6</sub> was synthesized according to previously reported protocol.<sup>1</sup> The purchased reagents and solvents were used without additional purification.

## Instrumentation:

Peptoid oligomers and their ruthenium complexes were analyzed by reversed-phase HPLC (analytical C18(2) column, Phenomenex, Luna 5μm, 100 Å, 2.0x50 mm) on a Jasco UV-2075 PLUS detector. A linear gradient of 5–95% ACN in water (0.1% TFA) over 10 min was used at a flow rate of 700 μL/min. Preparative HPLC was performed using a AXIA Packed C18(2) column (Phenomenex, Luna 15μm, 100 Å, 21.20x100mm). Peaks were eluted with a linear gradient of 5–95% ACN in water (0.1% TFA) over 50 min at a flow rate of 5 mL/min. Mass spectrometry of peptoid oligomers was performed on a Advion expression CMS mass spectrometer under electrospray ionization (ESI), direct probe ACN:H<sub>2</sub>O (95:5), flow rate 0.2 ml/min. Analysis of ruthenium complexes was performed on Autoflex III smartbeam MALDI Bruker (matrix DCTB) and on a Waters LCT Premier mass spectrometer under electrospray ionization (ESI), direct probe ACN:H<sub>2</sub>O (70:30), flow rate 0.3 ml/min. UV measurements were performed using an

Agilent Cary 60 UV-Vis spectrophotometer. CD measurements were performed using a circular dichroism spectrometer Applied Photophysics chirascan. Electrochemistry was carried out on Iviumstat XRe potentiostat.  $^1\text{H}$ -NMR and  $^{13}\text{C}$ -NMR measurements were performed on Bruker spectrometer AVIII400 using  $\text{CDCl}_3$  as a solvent. Data processing was done with the softwares Excel and KaleidaGraph.

### **Synthesis and Purification of the Peptoid Oligomers**

Solid-phase synthesis of Peptoid oligomers was carried out manually in fritted syringes on Rink amide resin at room temperature using the previously reported peptoid sub-monomer protocol.<sup>2</sup> Peptoid synthesis was performed with alternating bromoacylation and amine displacement steps until peptoid oligomers of desired sequence were obtained. Cyclization process was performed according to the previously reported procedure.<sup>3</sup> After the peptoid synthesis, the products were cleaved from the resin by treatment with 95% trifluoroacetic acid (TFA) in water (50 mL  $\text{g}^{-1}$  resin) for 30 minutes. After filtration, the cleavage mixture was concentrated in vacuum and cleaved samples were then re-suspended in 50% acetonitrile in water and lyophilized to powders. Peptoids and their ruthenium complexes were purified by preparative High Performance Liquid Chromatography (HPLC) using a C18 column. Products were detected by UV absorbance at 230 nm during a linear gradient conducted from 5% to 95% solvent B (0.1% TFA in HPLC grade acetonitrile) over solvent A (0.1% TFA in HPLC grade water) in 50 minutes with a flow rate of 5 mL  $\text{min}^{-1}$ . Purified products were analyzed by reversed-phase HPLC (C18 column) with a linear gradient of 5–95% ACN in water (0.1% TFA) over 10 min at a flow rate of 700  $\mu\text{L}/\text{min}$  and 214 nm UV absorbance.

### **Circular Dichroism**

Approximately 500  $\mu\text{L}$  solutions (5 mM in ACN) of lyophilized peptoids powders and their Ru(II) complexes were prepared immediately before CD measurements. CD scans were performed at room temperature at concentration of 30–200  $\mu\text{M}$  in solution of ACN. The spectra were obtained by averaging 4 scans per sample in a fused quartz cell (path length = 0.1 cm), over the 370 to 190 nm region at a step of 1 nm (scan rate=1 sec/step).

## Cyclic Voltammetry

Cyclic voltammograms were obtained at room temperature in acetonitrile with 0.1 M TBA-PF<sub>6</sub> as the supporting electrolyte. The CV traces were recorded at 0.5 mM for (L1B)<sub>3</sub>Ru, (C3B)Ru, (bipy-DM)<sub>3</sub>Ru and (bipy)<sub>3</sub>Ru and 0.25 mM for (L2B)<sub>3</sub>Ru<sub>2</sub> complex concentrations using a glassy carbon working electrode, platinum counter electrode and Ag/AgNO<sub>3</sub> reference electrode at a scan rate of 100 mV s<sup>-1</sup>.

## UV-VIS Spectroscopy

UV-VIS experiments of the peptoid oligomers and Ru(II) complexes were performed in ACN solution using 17-50 μM concentration and measuring the spectra from 200-800 nm using an Agilent Cary 60 UV-Vis spectrophotometer.

**Table S1.** Peptoid oligomer sequences.

Nspe = (S)-(-)-1-phenylethylamine, Nrpe = (R)-(+)-1-phenylethylamine, Nbp-(2,2'-

| Peptoid oligomers                                         | Molecular weight     |
|-----------------------------------------------------------|----------------------|
|                                                           | Calc: Found (gr/mol) |
| Tetramer ( Npm- Npm- Nbp- Npm)                            | 713.80 : 714.00      |
| <b>L1B</b> (Nspe-Nspe-Nspe-Nspe-Nbp) linear               | 917.10: 917.89       |
| <b>L2B</b> (Nspe- Nbp -Nspe-Nspe-Nbp- Nspe) linear        | 1172.38 : 1172.57    |
| <b>L3B</b> (Npl -Nbp -Nspe- Nbp - Nspe- Nbp- Nspe) linear | 1400.02 : 1400.39    |
| <b>C3B</b> (Nbp -Nspe- Nbp - Nspe- Nbp- Nspe) cyclic      | 1363.56 : 1363.54    |
| <b>R-L1B</b> (Nrpe-Nrpe-Nrpe-Nrpe-Nbp) linear             | 917.10: 917.34       |
| <b>R-L2B</b> (Nrpe- Nbp -Nrpe-Nrpe-Nbp- Nrpe) linear      | 1172.38 : 1172.30    |
| <b>R-C3B</b> (Nbp -Nrpe- Nbp - Nrpe- Nbp- Nrpe) cyclic    | 1363.56 : 1363.14    |
| <b>Di-L1B</b> ( Nspe- Nbp)                                | 433.50 : 434.18      |

bipyridine-3'-yloxy) ethylamine, Npl- chloropropylamine, Npm = N-benzylamine

**Table S2.** Ru(II) complexes.

| Peptoid and Ru(II) complexes                                                  | Molecular weight                                                        | $E_p^{ox}$ (V, vs. Ag/AgNO <sub>3</sub> ) |
|-------------------------------------------------------------------------------|-------------------------------------------------------------------------|-------------------------------------------|
|                                                                               | Calc: Found: Computed (gr/mol)                                          |                                           |
| ( <b>L1B</b> ) <sub>3</sub> Ru                                                | 2852.38 : 1427.04 (m/2z) : 1427.16 (m/2z)                               | 0.94                                      |
| ( <b>L2B</b> ) <sub>3</sub> Ru <sub>2</sub> -PF <sub>6</sub>                  | 3864.24 : 966.36 (m/4z) : 966.87 (m/4z)                                 | 0.88                                      |
| ( <b>L2B</b> ) <sub>3</sub> Ru <sub>2</sub> - (PF <sub>6</sub> ) <sub>3</sub> | 4154.16 : 1039.61 (m/4z) : 1039.35 (m/4z)                               |                                           |
| ( <b>C3B</b> )Ru                                                              | 1465.64 (m/z) : 1465.71 (m/z)                                           | 0.90                                      |
| ( <b>R-L1B</b> ) <sub>3</sub> Ru                                              | 2852.38 : 1426.64 (m/2z) : 1427.15 (m/2z)                               | N/A                                       |
| ( <b>R-L2B</b> ) <sub>3</sub> Ru <sub>2</sub> -PF <sub>6</sub>                | 3864.24 : 966.37 (m/4z) : 966.62 (m/4z)                                 | N/A                                       |
| ( <b>R-C3B</b> )Ru                                                            | 1465.64 (m/z) : 1465.76 (m/z)                                           | N/A                                       |
| ( <b>Di-L1B</b> ) <sub>3</sub> Ru                                             | 1401.58 : 1440.44 (m/z+K <sup>+</sup> ) : 1440.50 (m/z+K <sup>+</sup> ) | 0.88                                      |
| ( <b>bp-DM</b> ) <sub>3</sub> Ru                                              | 834.34 (m/z) : 834.33 (m/z)                                             | 1.22                                      |

**Synthetic procedure for Nbp:**

*Nbp* = 2-(2, 2'-bipyridine-6-yloxy) ethylamine was synthesized by S<sub>N</sub>2 reaction between ethanolamine deprotonated by potassium hydroxide in DMSO solution and 6-Bromo-2,2'-bipyridine.

2,2'- Bipyridineamine was synthesized according to similar procedure previously published.<sup>4</sup> To a solution of DMSO (5 ml) with KOH (0.28 gr) and ethanolamine (100 µL) 6-Bromo-2,2'-bipyridine (0.255 gr) was added and the solution was stirred for five hours at 50 °C (Scheme 1). To The reaction mixture was then added 40ml of methylene chloride and washed three times with water, dried over Na<sub>2</sub>SO<sub>4</sub> and the solvent was removed (0.2 gr, yield 86%). The product analyzed by <sup>1</sup>H NMR (400 MHz, CDCl<sub>3</sub>): δ 8.67 (1H,dd) δ 8.38 (1H,m) δ 8.00 (1H,d) δ 7.82 (1H,d) δ 7.70 (1H, t) δ 7.29 (1H,m) δ

6.80 (1H,d)  $\delta$  4.46 (2H, t)  $\delta$  3.13 (2H, t) and  $^{13}\text{C}$  NMR (100MHz,  $\text{CDCl}_3$ )  $\delta$  163.35, 156.16, 153.37, 149.43, 139.22, 137.13, 123.90, 121.12, 113.69, 111.37, 67.98, 41.53. ESI-MS calculated: 215.3; found: 216.1.

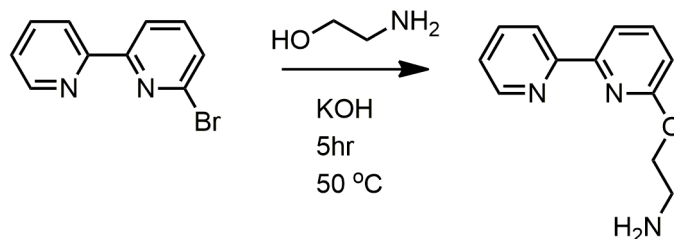

**Scheme 1:** Synthetic routes to the primary amine Nbp.

#### Synthetic procedure for bpDM:

To a solution of DMSO (5 ml) with KOH (0.17 gr) and 2-Dimethaminoethanol (85  $\mu\text{L}$ ) 6-Bromo-2,2'-bipyridine (0.15 gr) was added and the solution was stirred for five hours at 50 °C (Scheme 2). To The reaction mixture was then added 40ml of methylene chloride and washed three times with water, dried over  $\text{Na}_2\text{SO}_4$  and the solvent was removed (0.11 gr, yield 71%). The product analyzed by  $^1\text{H}$  NMR (400 MHz,  $\text{CDCl}_3$ ):  $\delta$  8.57 (1H, d)  $\delta$  8.3 (1H,s)  $\delta$  7.94 (1H,d)  $\delta$  7.71 (1H,t)  $\delta$  7.64 (1H, t)  $\delta$  7.20 (1H,t)  $\delta$  6.70 (1H,d)  $\delta$  4.48 (2H, t)  $\delta$  2.7 (2H, t)  $\delta$  2.29 (6H, s) and  $^{13}\text{C}$  NMR (100MHz,  $\text{CDCl}_3$ )  $\delta$  163.10, 156.09, 153.30, 149.09, 139.42, 136.74, 123.48, 120.93, 113.75, 111.59, 67.39, 58.28, 45.95.

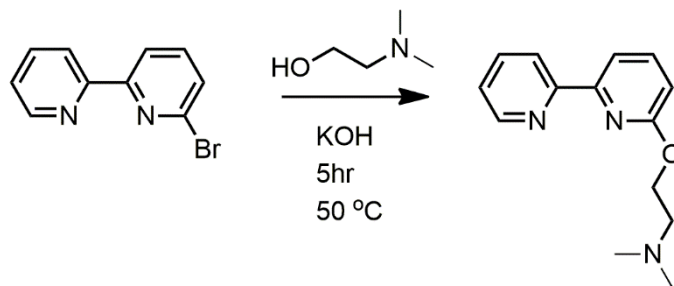

**Scheme 2:** Synthetic routes to the tertiary amine bpDM.

#### References:

1. J. V. Caspar and T. J. Meyer, *J. Am. Chem. Soc.* 1983, **105**, 5583-5590.
2. R. N. Zuckermann, J. M. Kerr, S. B. W. Kent and W. H. Moosm *J. Am. Chem. Soc.*, 1992, **114**, 10646-10647.
3. P. J. Kaniraj and G. Maayan, *Org. Lett.*, 2015, **17**, 2110–2113.

4. G. Maayan, B. Yoo and K. Kirshenbaum, *Tetrahedron Letters*, 2008, **49**, 335-338.

### Synthesis of Ruthenium complexes

General: To the flask of 25 ml peptoid oligomers or bpDM ligand in dry EtOH were added and the solutions were heated to 70 °C. Then, desired equivalent of RuCl<sub>3</sub> hydrate was added and the mixtures were refluxed for 24 hours in a case of **L2B**, **R-L2B**, **C3B** and **R-C3B** and 30 hours in a case of **L1B**, **R-L1B**, **Di-L1B** and **bpDM** under nitrogen atmosphere. The complexes (orange-red) were precipitated by addition of aqueous NH<sub>4</sub>PF<sub>6</sub>, washed twice with water and lyophilized overnight. Peptoid-Ru complexes were then dissolved in 50% ACN in water and purified by preparative HPLC using standard peptoid purification process. The fractions collected from HPLC were lyophilized to yield a dark orange solid. (**bpDM**)<sub>3</sub>Ru complex was purified by alumina column chromatography using ACN/toluene (50:50 v/v) as a mobile phase.

(**L1B**)<sub>3</sub>Ru: 20 mg of **L1B** in 2 ml of dry EtOH and 0.3 equiv. of Ruthenium chloride hydrate. (6.8 mg, 30% yield).

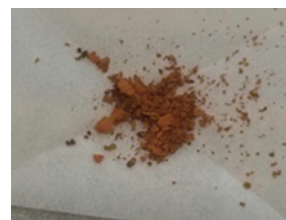

(**L2B**)<sub>3</sub>Ru<sub>2</sub>: 10 mg of **L2B** in 1.2 ml of dry EtOH and 0.70 equiv. of Ruthenium chloride hydrate. (3.7 mg, 30% yield).

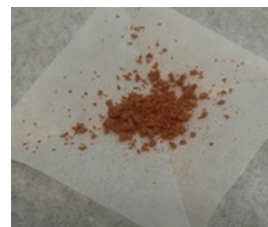

(**C3B**)Ru: 10 mg of **C3B** in 1.2 ml of dry EtOH and 1 equiv. of Ruthenium chloride hydrate. (6.4 mg, 54% yield).

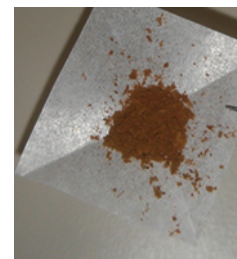

(**R-L1B**)<sub>3</sub>Ru: 10 mg of **R-L1B** in 2 ml of dry EtOH and 0.3 equiv. of Ruthenium chloride hydrate. (3.2 mg, 28% yield).

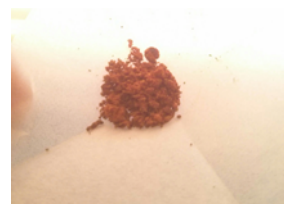

(**R-L2B**)<sub>3</sub>Ru<sub>2</sub>: 15 mg of **R-L2B** in 1.2 ml of dry EtOH and 0.70 equiv. of Ruthenium chloride hydrate. (5.9 mg, 32% yield).

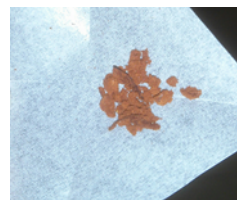

(**R-C3B**)Ru: 10 mg of **R-C3B** in 1.2 ml of dry EtOH and 1 equiv. of Ruthenium chloride hydrate. (3.4 mg, 29% yield).

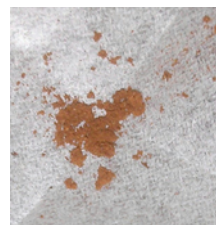

(**Di-L1B**)Ru: 30 mg of **Di-L1B** in 2 ml of dry EtOH and 0.3 equiv. of Ruthenium chloride hydrate. (15 mg, 38% yield).

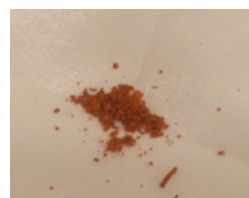

(**bpDM**)<sub>3</sub>Ru: 40 mg of **bipy-DM** in 2 ml of dry EtOH and 0.3 equiv. of Ruthenium chloride hydrate. (17 mg, 37% yield).

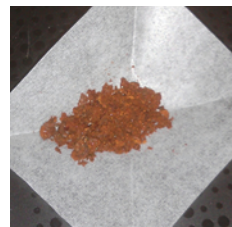

### HPLC of peptoid oligomers and their Ru(II) complexes

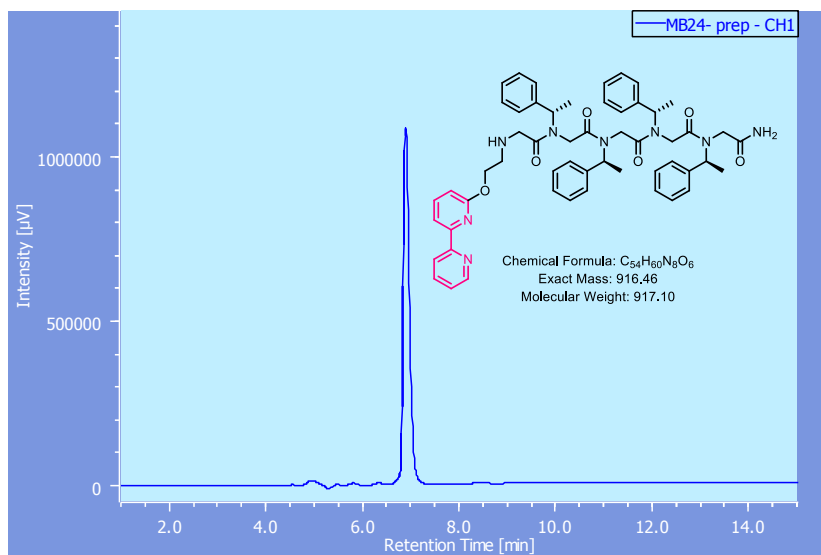

**Figure S1.** HPLC traces of purified peptoid oligomer **L1B** at 214nm.

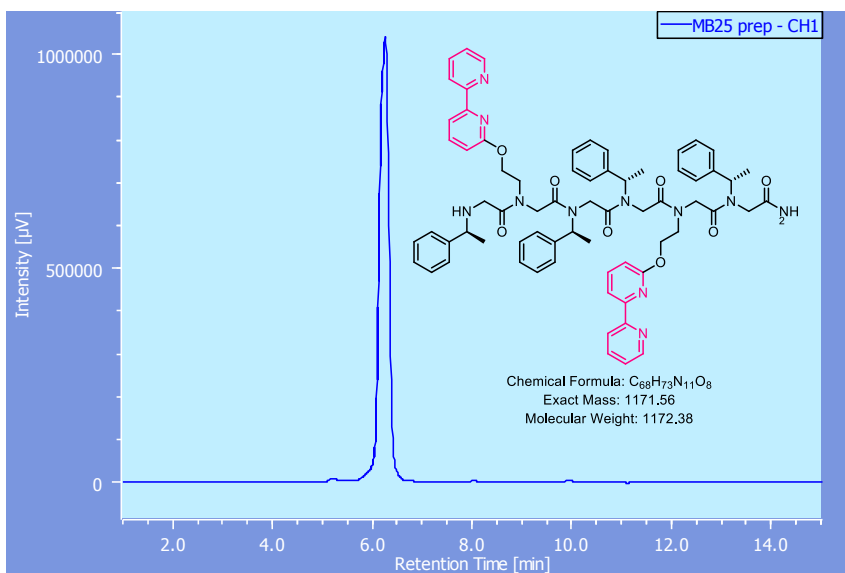

**Figure S2.** HPLC traces of purified peptoid oligomer **L2B** at 214nm.

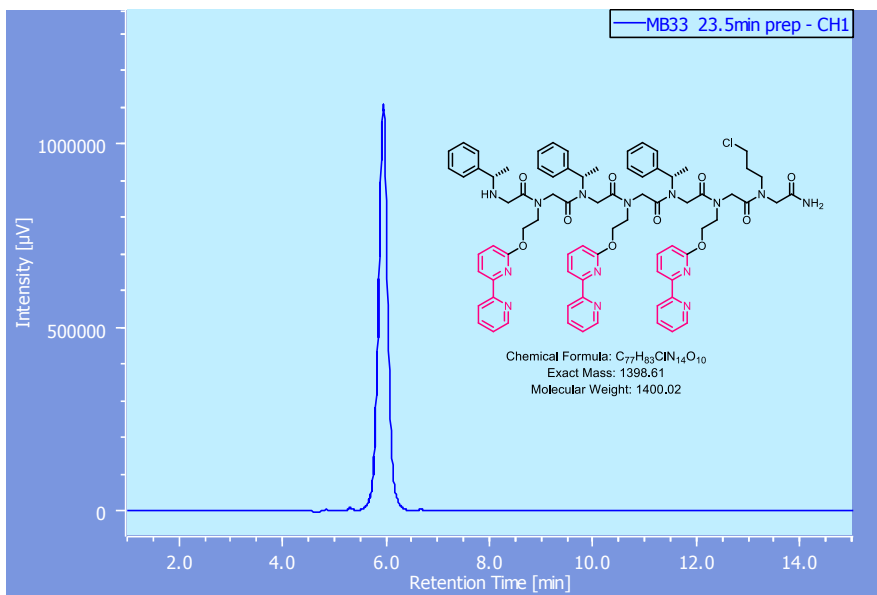

**Figure S3.** HPLC traces of purified peptoid oligomer **L3B** at 214nm.



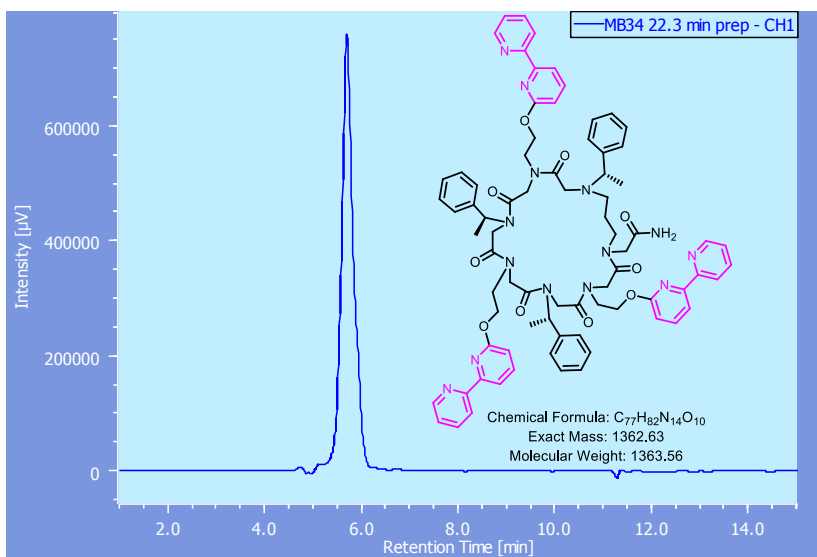

**Figure S4.** HPLC traces of purified peptoid oligomer **C3B** at 214nm.

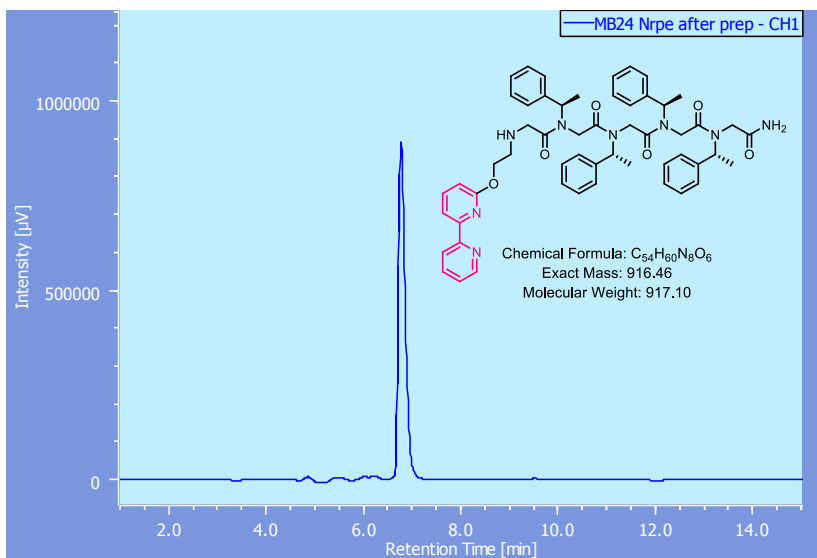

**Figure S5.** HPLC traces of purified peptoid oligomer **R-L1B** at 214nm.

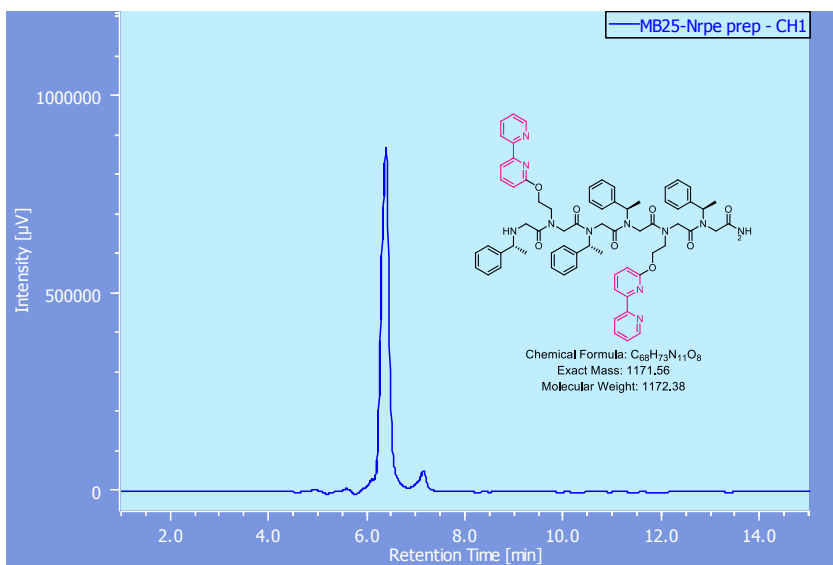

**Figure S6.** HPLC traces of purified peptoid oligomer **R-L2B** at 214nm.

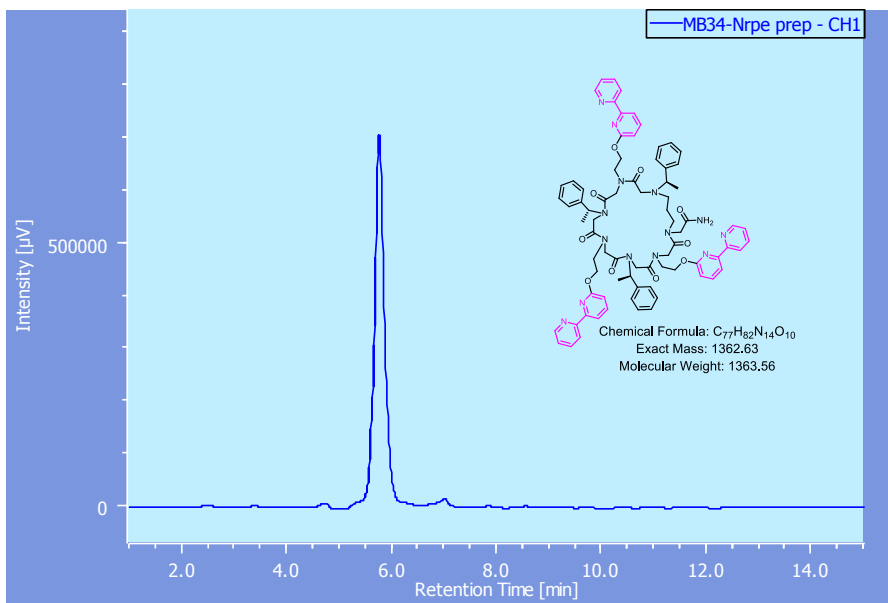

**Figure S7.** HPLC traces of purified peptoid oligomer **R-C3B** at 214nm.

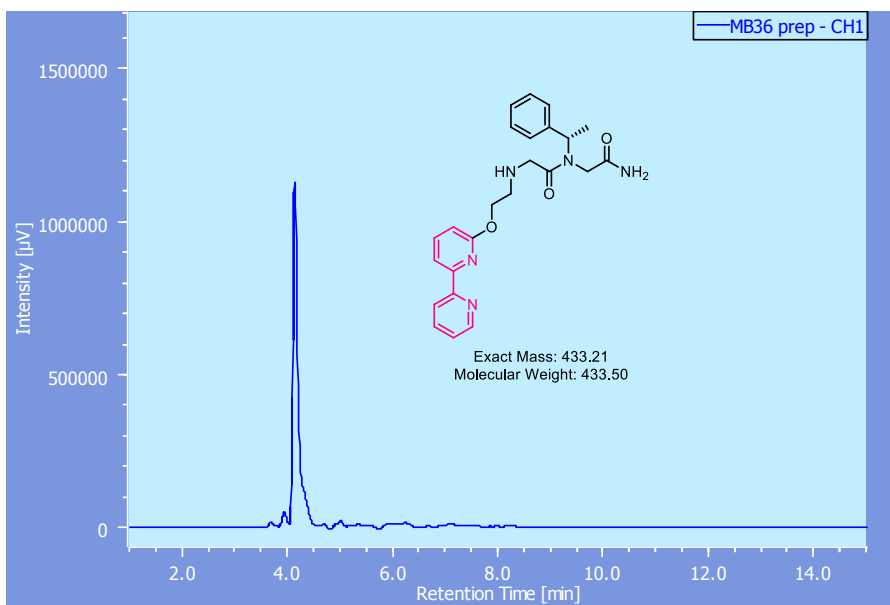

**Figure S8.** HPLC traces of purified peptoid oligomer **Di-L1B** at 214nm.

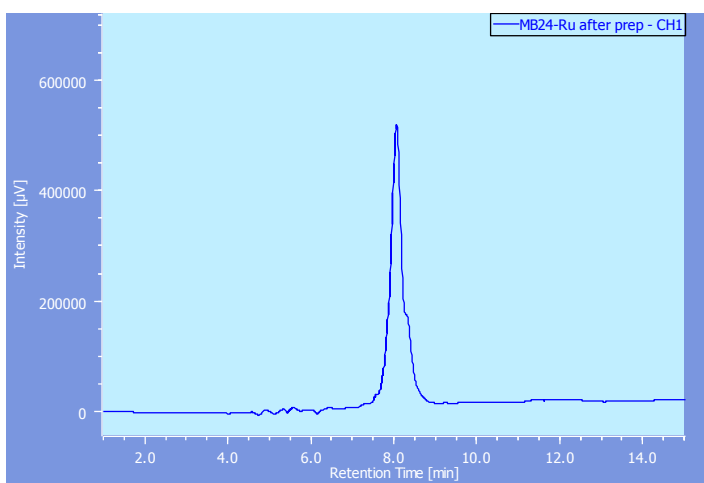

**Figure S9.** HPLC traces of purified metallopeptoid complex **(L1B)<sub>3</sub>Ru** at 214nm.

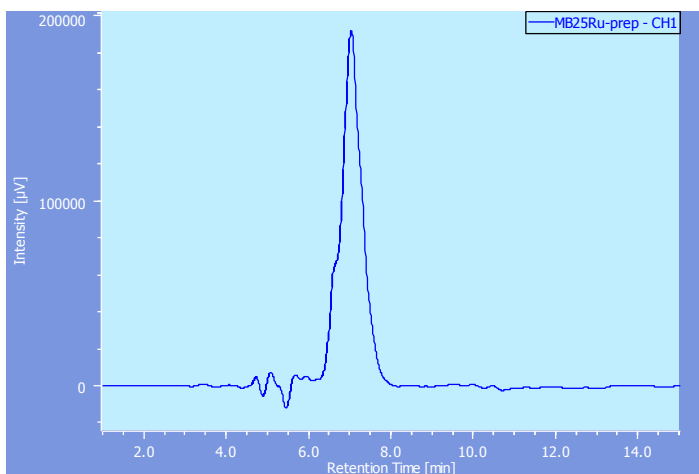

**Figure S10.** HPLC traces of purified metallopeptoid complex (L2B)<sub>3</sub>Ru<sub>2</sub> at 214nm.

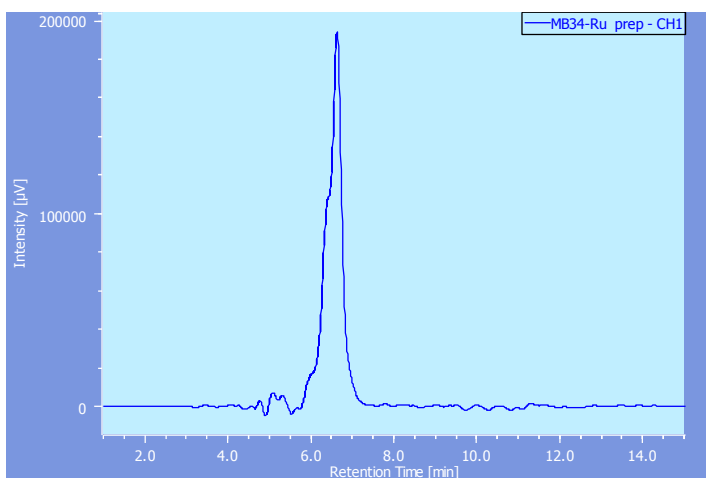

**Figure S11.** HPLC traces of purified metallopeptoid complex (C3B)Ru at 214nm.

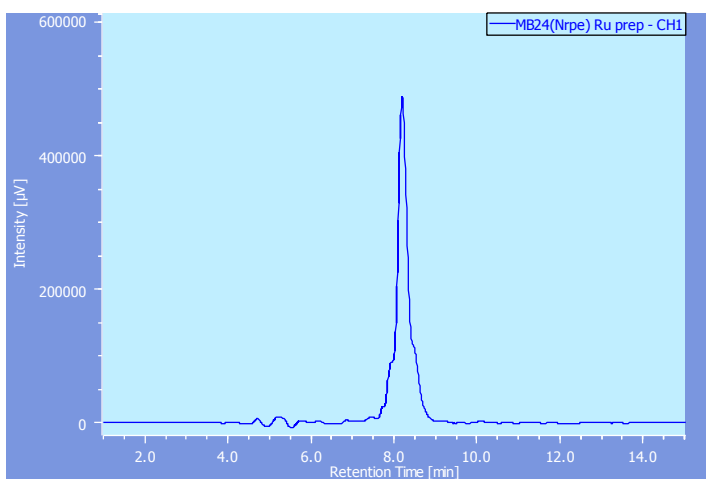

**Figure S12.** HPLC traces of purified metallopeptoid complex (R-L1B)<sub>3</sub>Ru at 214nm.

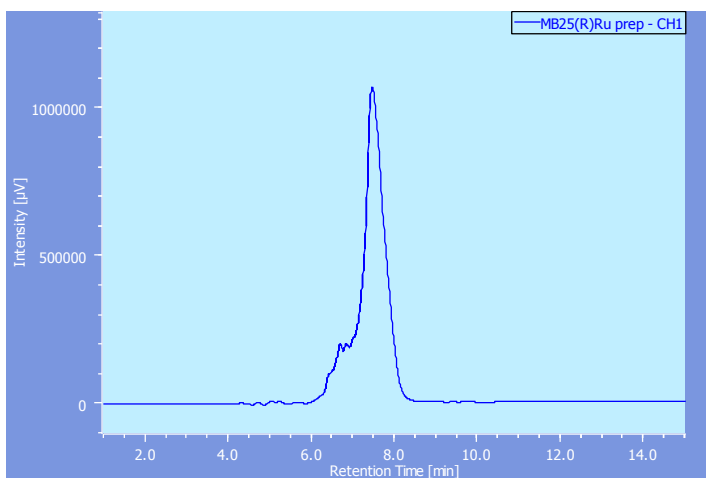

**Figure S13.** HPLC traces of purified metallopeptoid complex (R-L2B)<sub>3</sub>Ru<sub>2</sub> at 214nm.

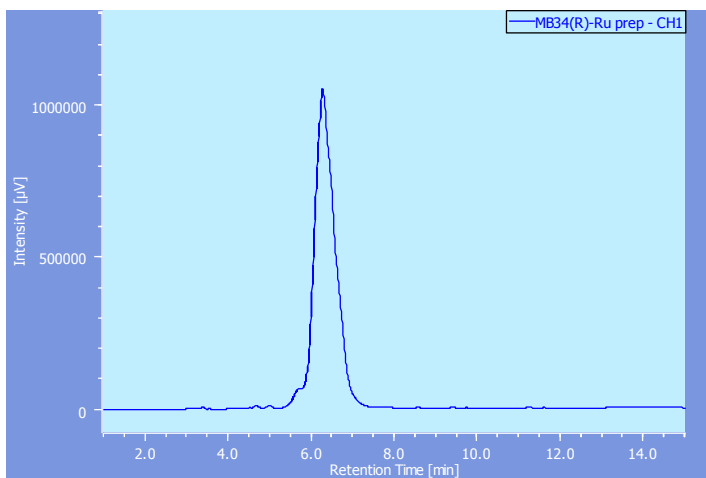

**Figure S14.** HPLC traces of purified metallopeptoid complex (R-C3B)Ru at 214nm.

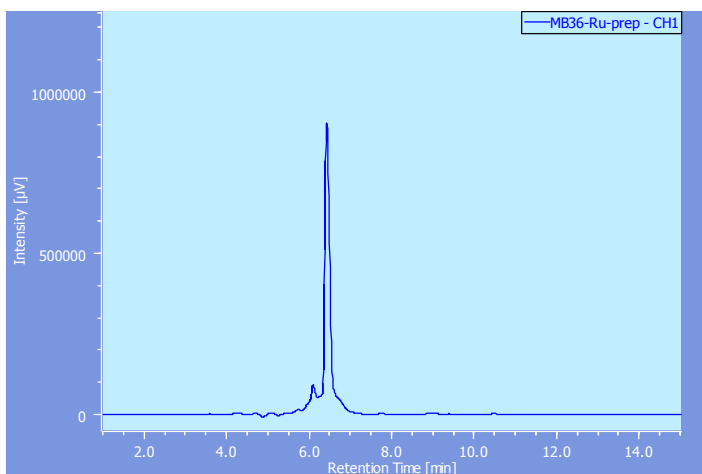

**Figure S15.** HPLC traces of purified metallopeptoid complex  $(\text{Di-L1B})_3\text{Ru}$  at 214nm.

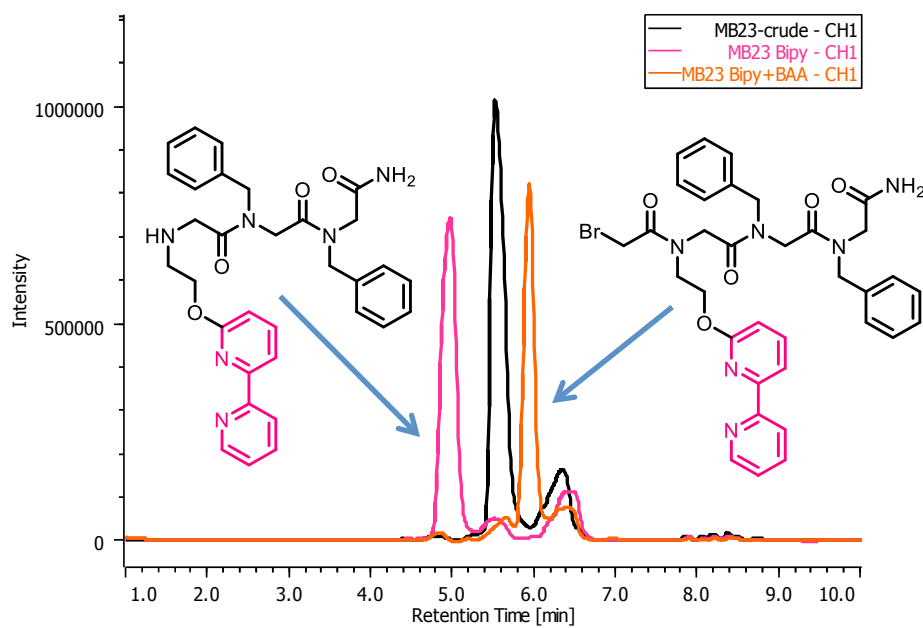

**Figure S16.** HPLC analyses at 214nm of crude trimer after addition of Bipy- $\text{NH}_2$  (pink) after acetylation (orange) and after substitution with benzylamine to create final crude peptoid tetramer (black).

### UV-Vis

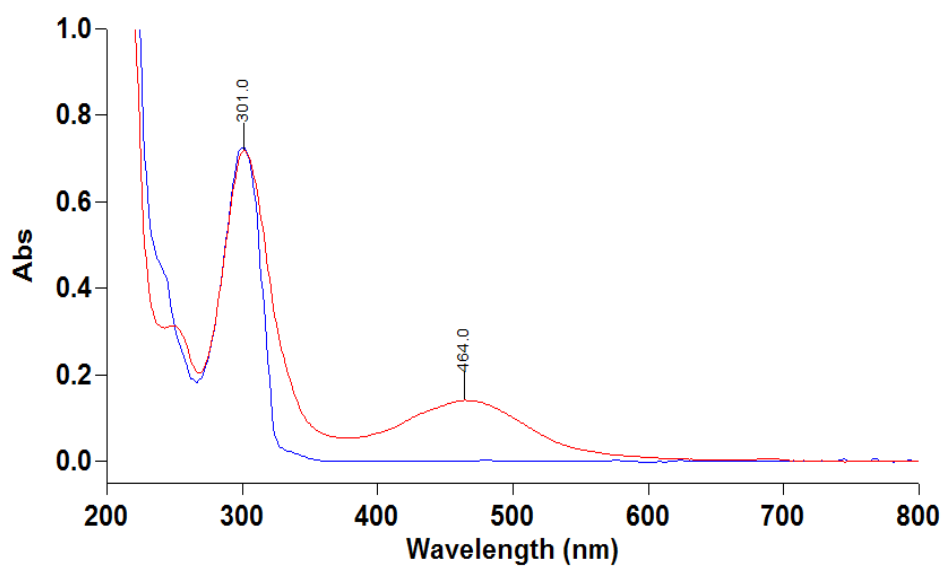

**Figure S17.** UV-Vis of **R-L1B** free preptoid (blue, 50  $\mu\text{M}$ ) and **(R-L1B)<sub>3</sub>Ru** complex (red, 17  $\mu\text{M}$ ).

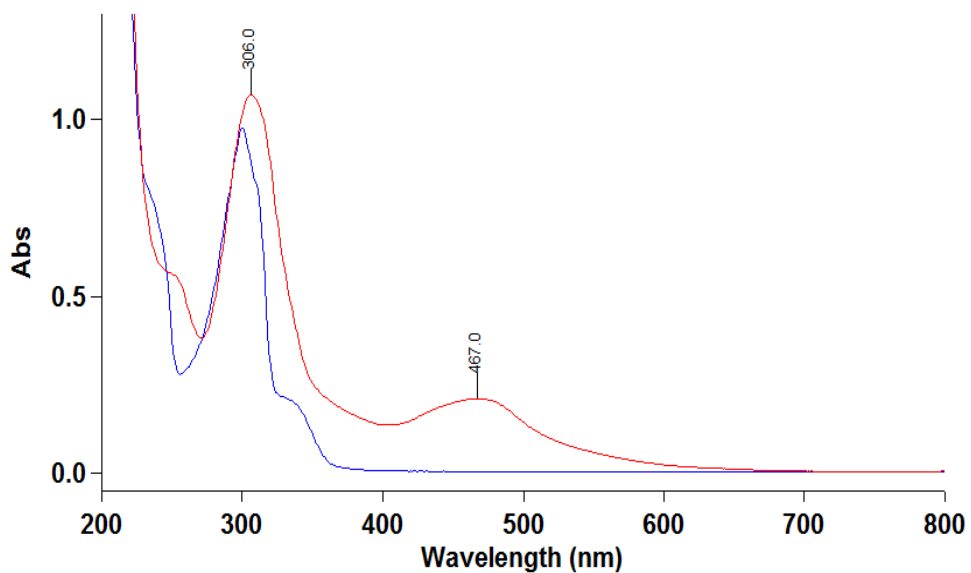

**Figure S18.** UV-Vis of **R-L2B** free preptoid (blue, 50  $\mu\text{M}$ ) and **(R-L2B)<sub>3</sub>Ru<sub>2</sub>** complex (red, 17  $\mu\text{M}$ ).

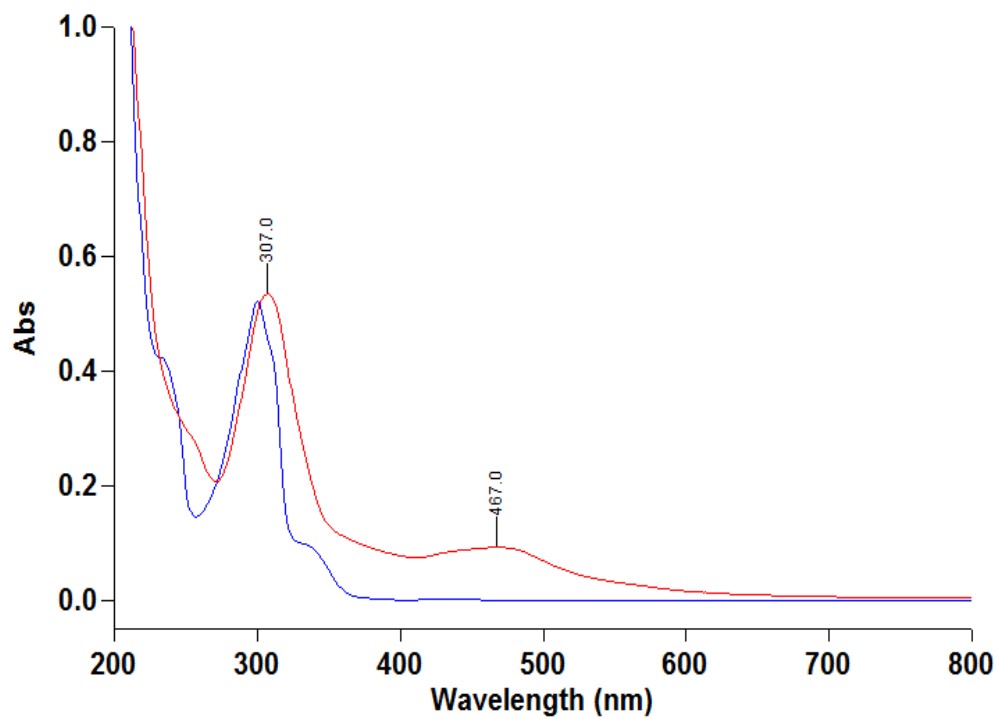

**Figure S19.** UV-Vis of **R-C3B** free preptoid (blue, 17  $\mu$ M) and **(R-C3B)Ru** complex (red, 17  $\mu$ M).

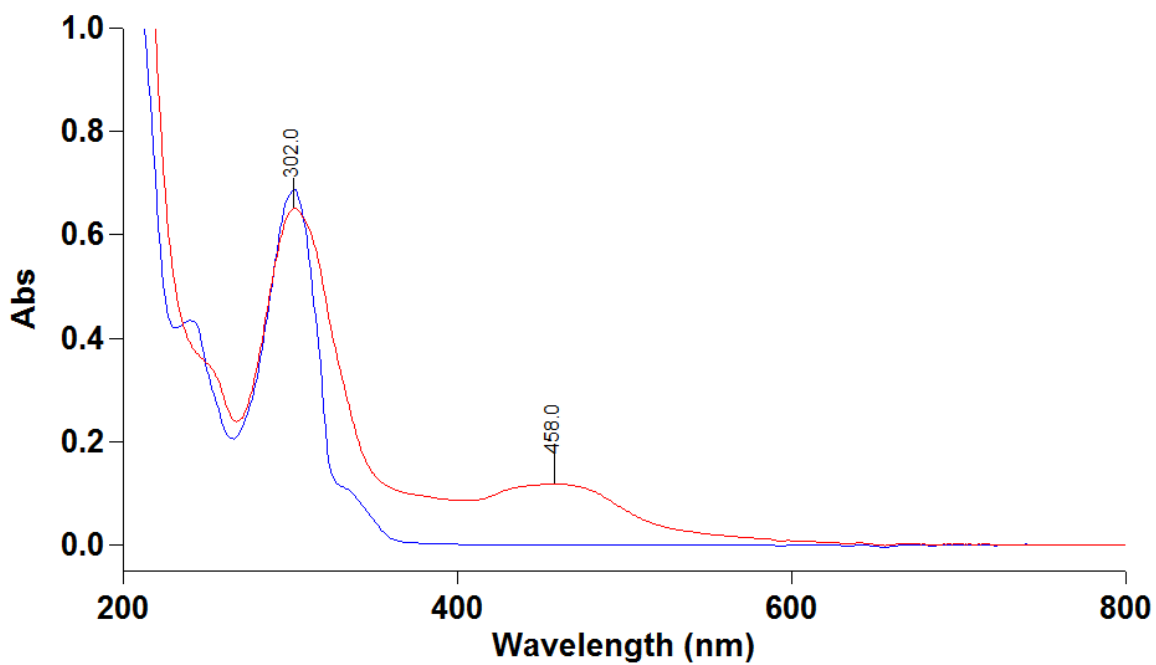

**Figure S20.** UV-Vis of **Di-L1B** free preptoid (blue, 17  $\mu$ M) and **(Di-L1B)<sub>3</sub>Ru** complex (red, 17  $\mu$ M).



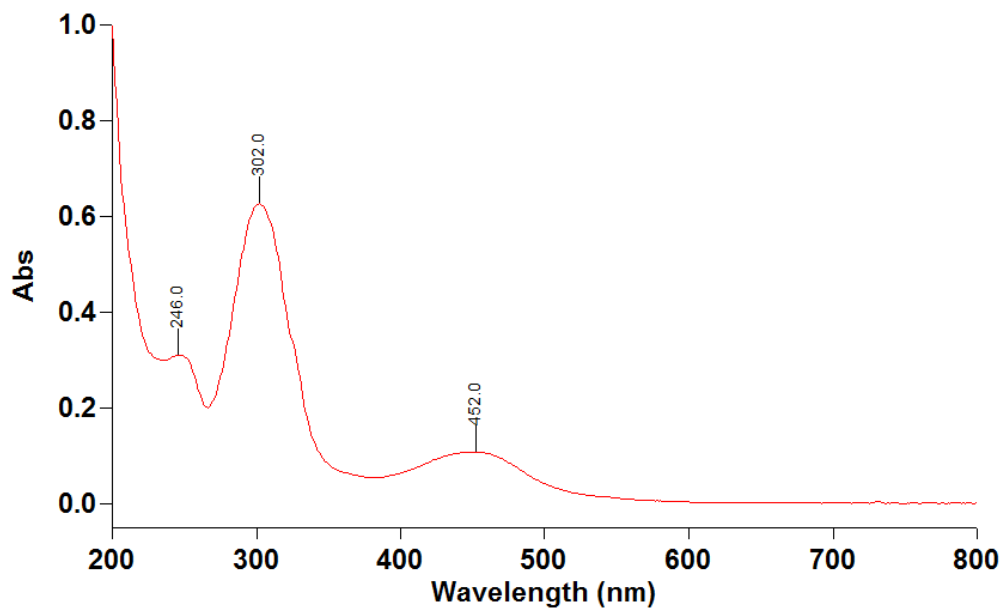

**Figure S21.** UV-Vis of (bp-DM)<sub>3</sub>Ru complex (red, 17  $\mu$ M).

ESI-MS of the peptoid oligomers:

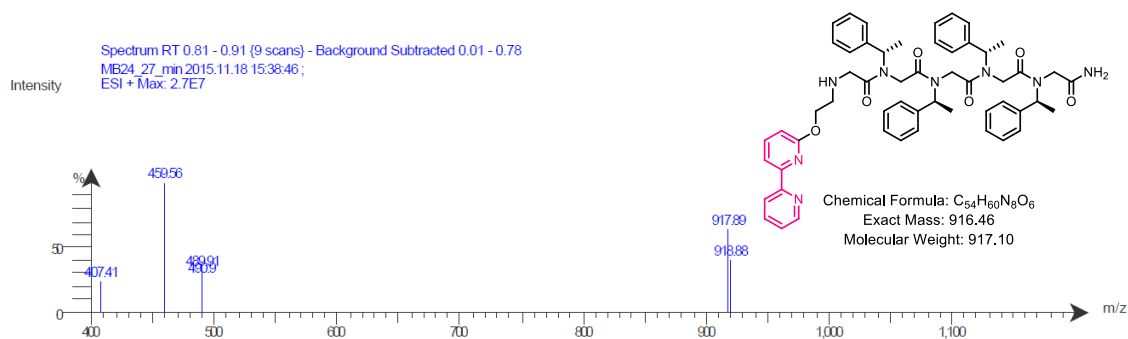

**Figure S22.** ESI-MS traces of peptoid oligomer **L1B**

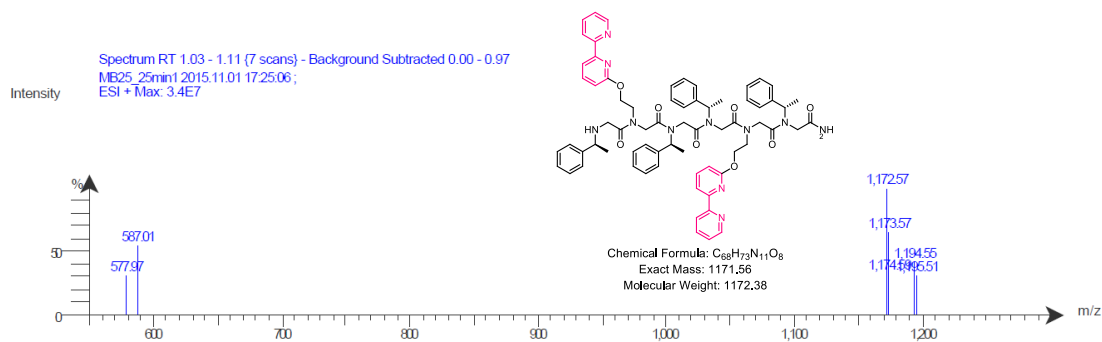

**Figure S23.** ESI-MS traces of peptoid oligomer **L2B**

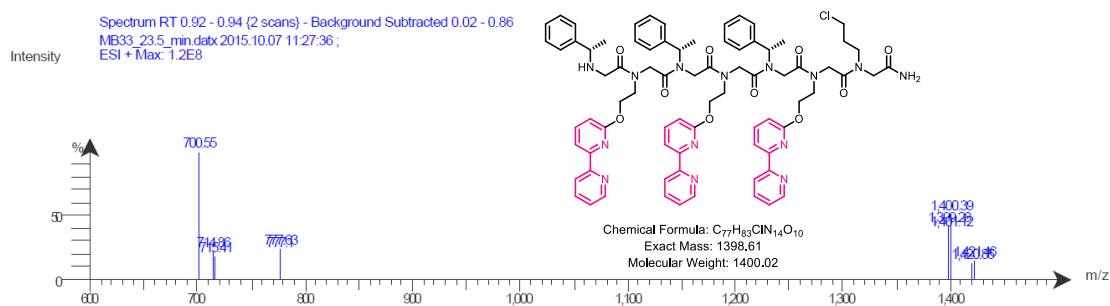

**Figure S24.** ESI-MS traces of peptoid oligomer **L3B**

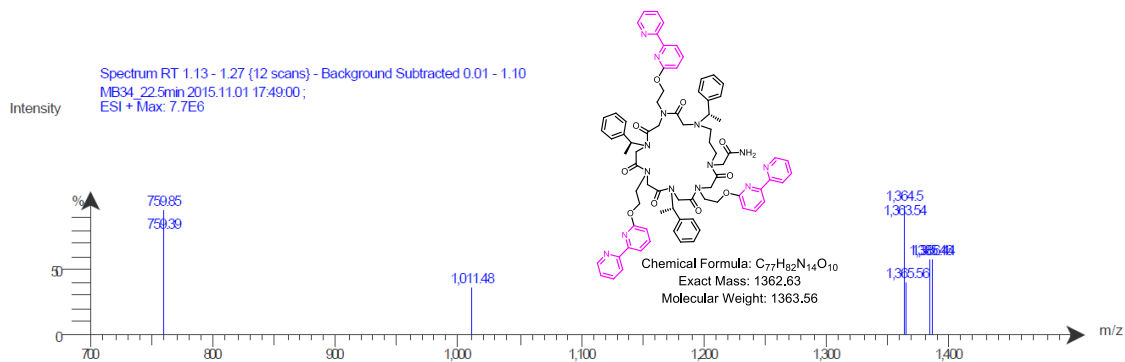

**Figure S25.** ESI-MS traces of peptoid oligomer **C3B**

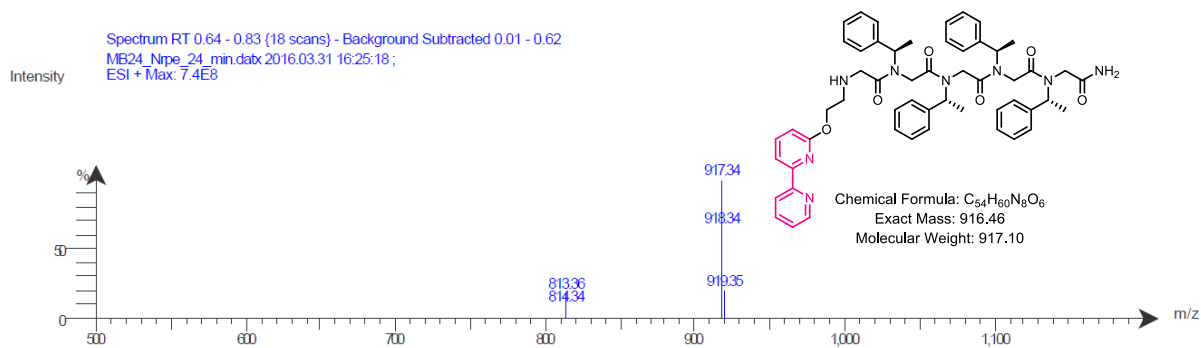

**Figure S26.** ESI-MS traces of peptoid oligomer **R-L1B**

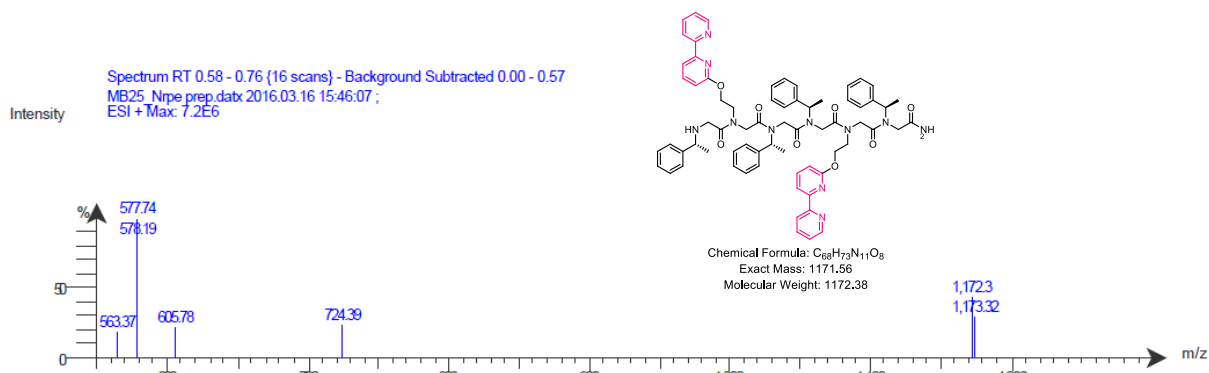

**Figure S27.** ESI-MS traces of peptoid oligomer **R-L2B**

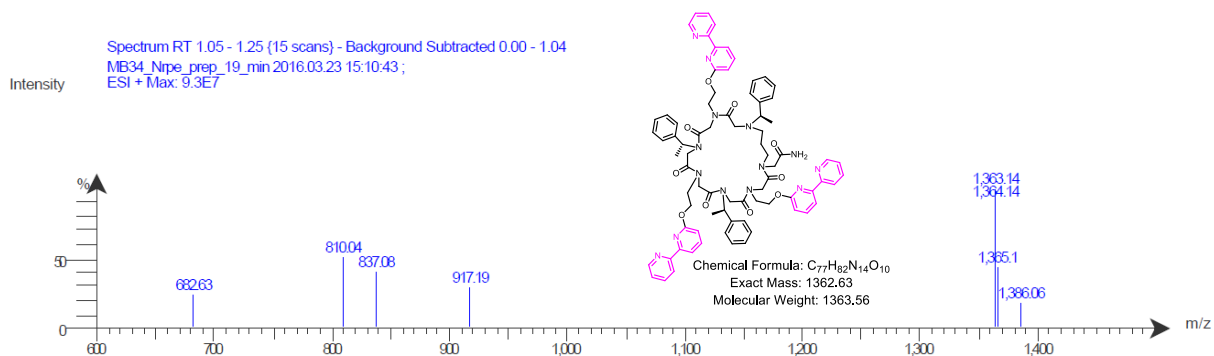

**Figure S28.** ESI-MS traces of peptoid oligomer **R-C3B**

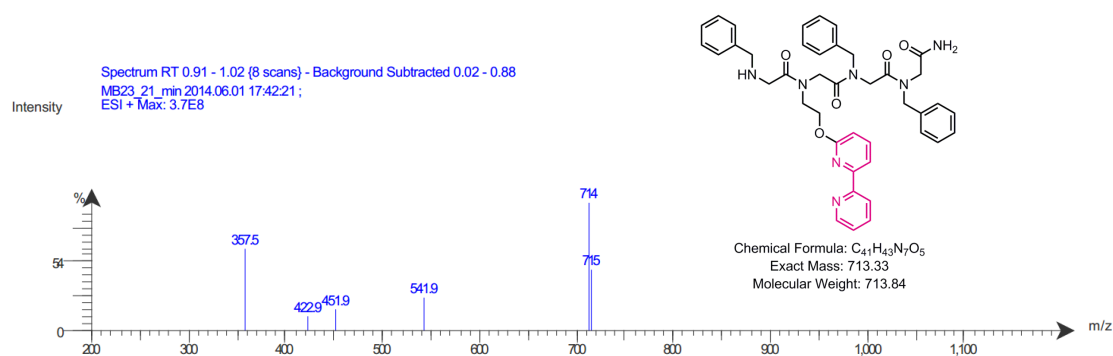

**Figure S29.** ESI-MS traces of peptoid oligomer tetramer

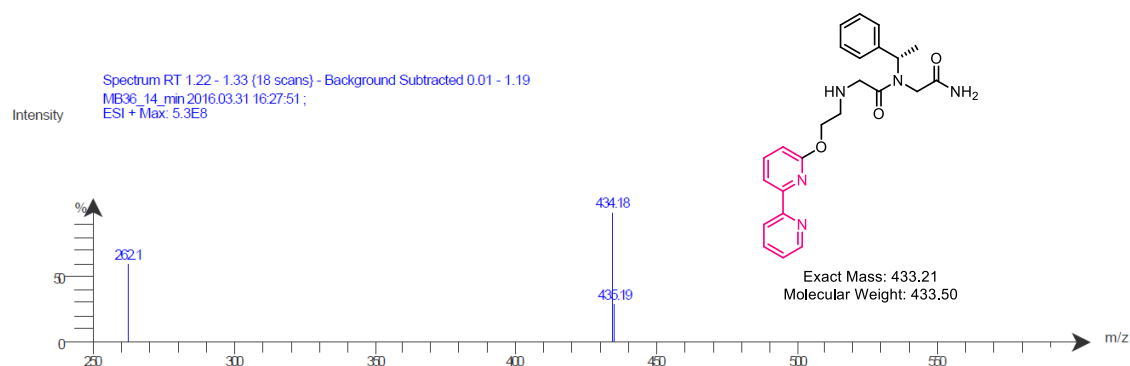

**Figure S30.** ESI-MS traces of peptoid **Di-L1B**.

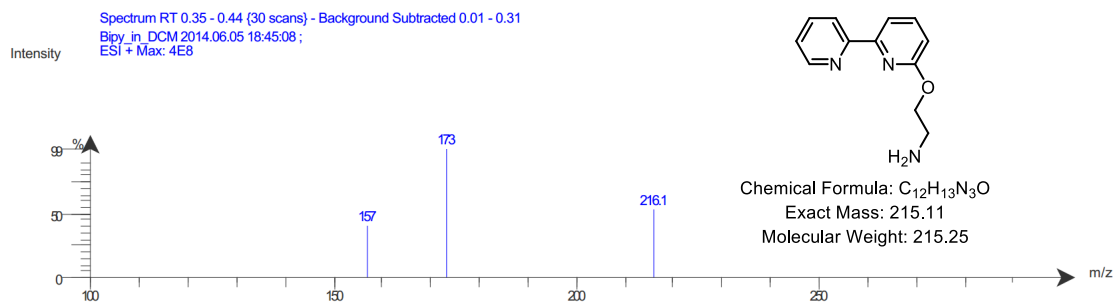

**Figure S31.** ESI-MS traces of the Nbp ligand

ESI-MS and MALDI of Ruthenium complexes:

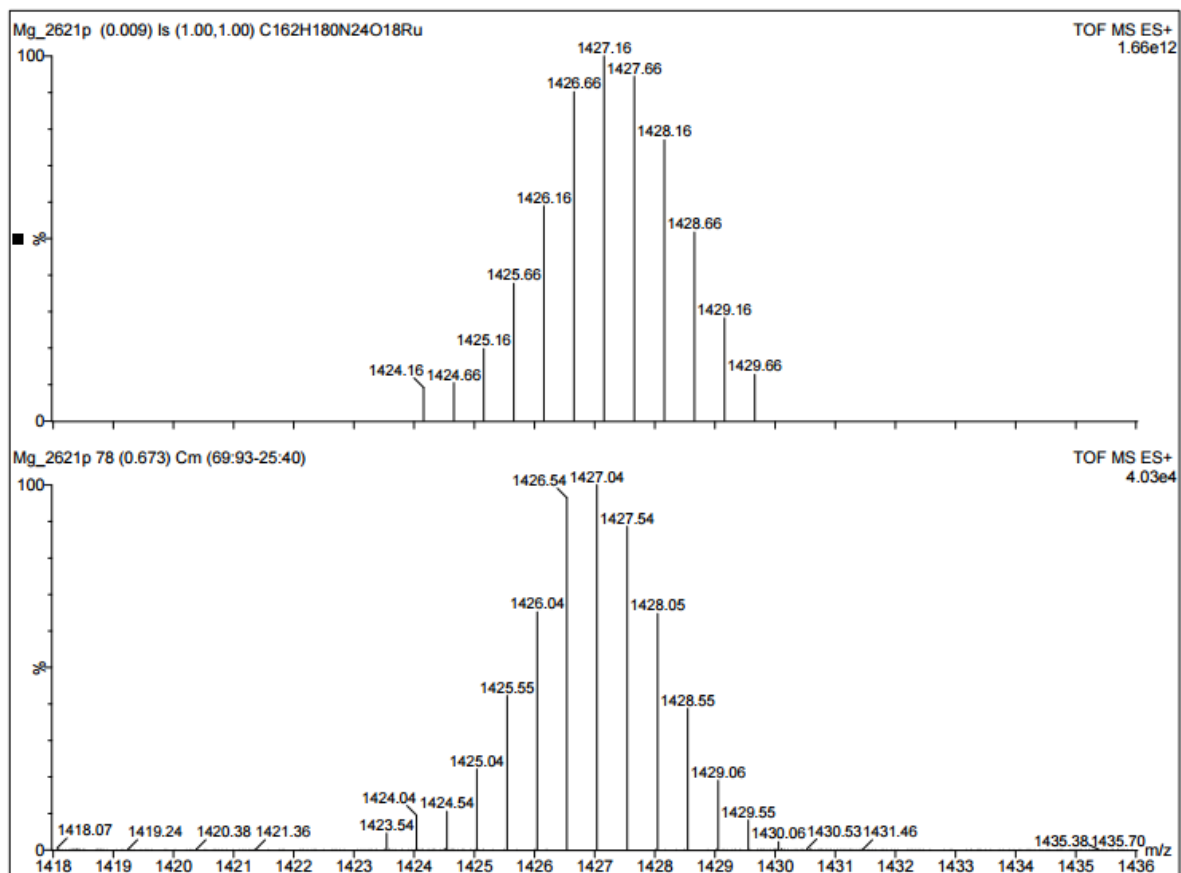

**Figure S32.** ESI-MS m/z traces of  $(\text{L1B})_3\text{Ru}$  complex (bottom) and computed ESI-MS spectrum (top).

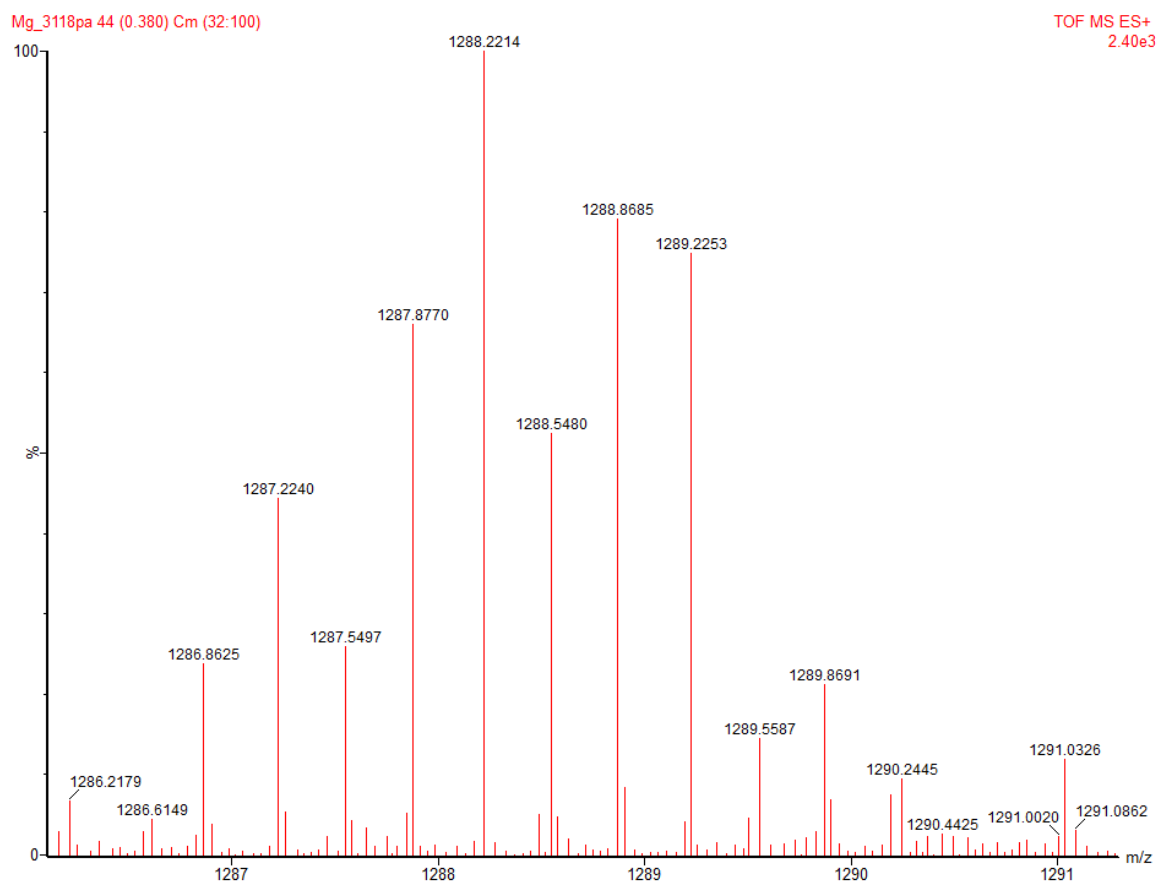

**Figure S33.** ESI-MS  $m/z$  traces of  $(\text{L2B})_3\text{Ru}_2\text{-PF}_6$  complex.

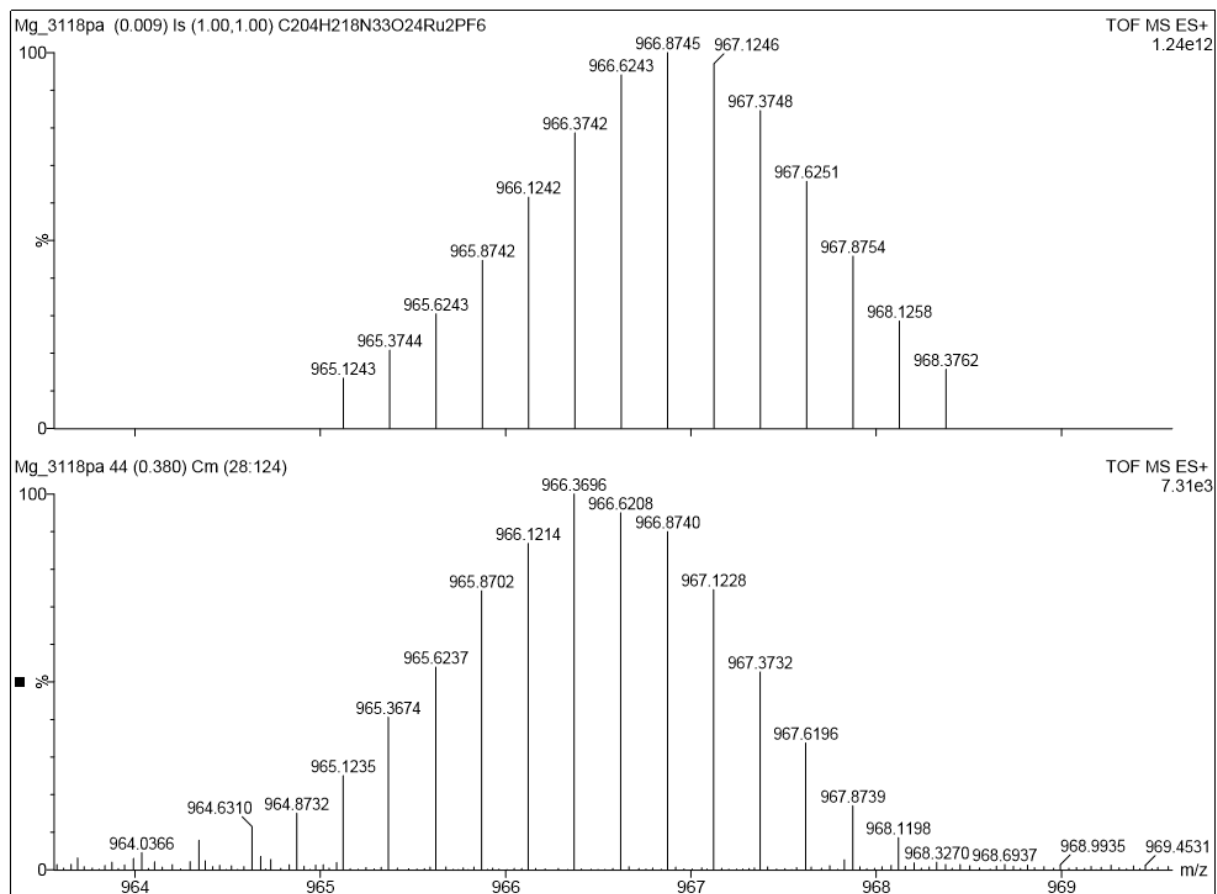

**Figure S34.** ESI-MS  $m+H/4z$  traces of  $(\text{L2B})_3\text{Ru}_2\text{-PF}_6$  complex (bottom) and computed ESI-MS spectrum (top).

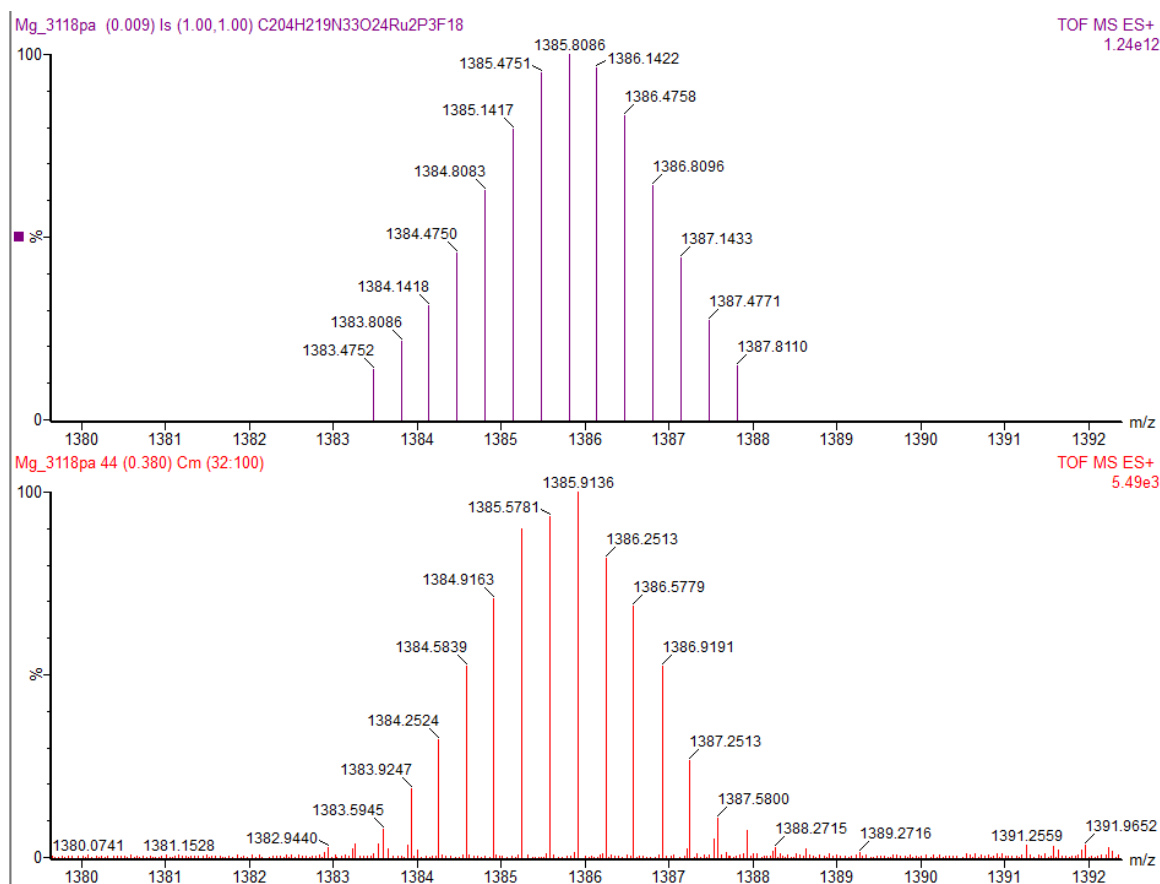

**Figure S35.** ESI-MS  $m+2H/3z$  traces of  $(L2B)_3Ru_2-(PF_6)_3$  complex (bottom) and computed ESI-MS spectrum (top).



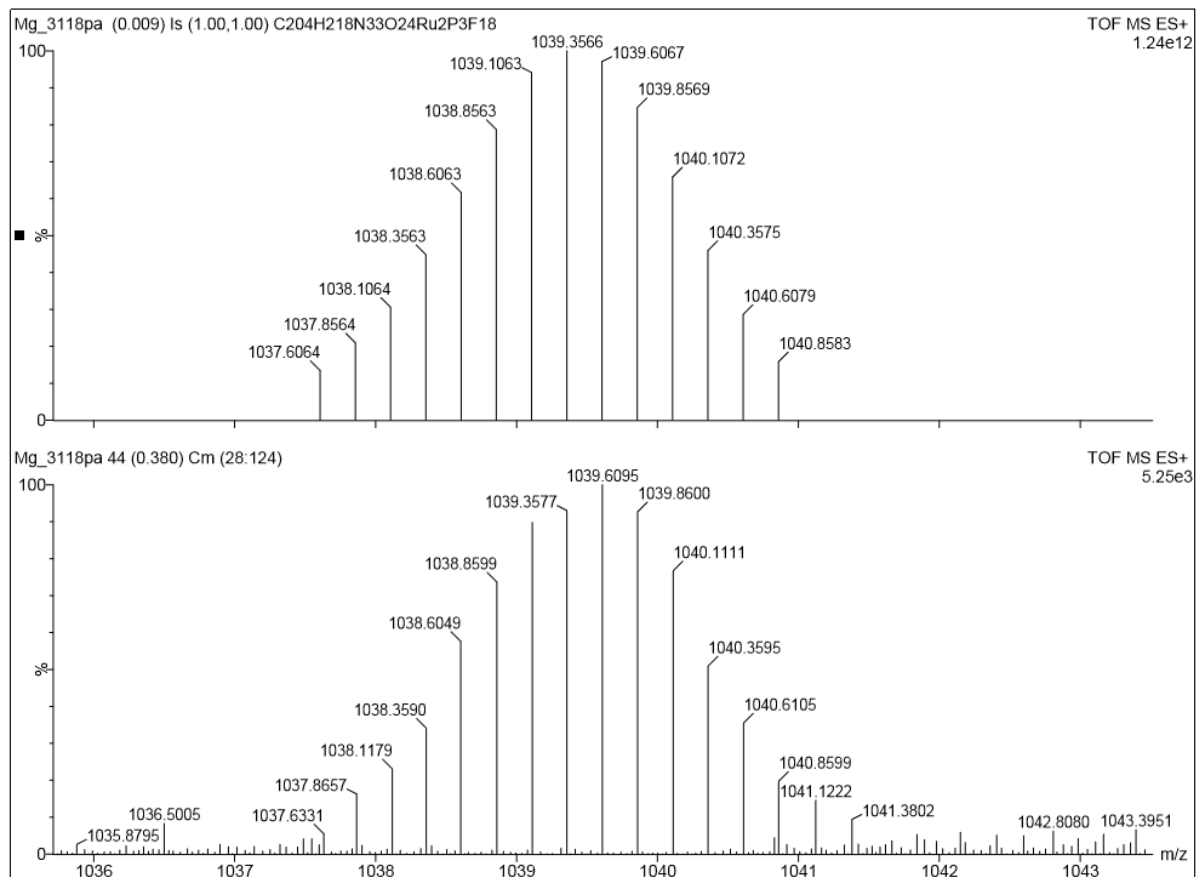

**Figure S36.** ESI-MS  $m+3H/4z$  traces of  $(\mathbf{L2B})_3\text{Ru}_2-(\text{PF}_6)_3$  complex (bottom) and computed ESI-MS spectrum (top).

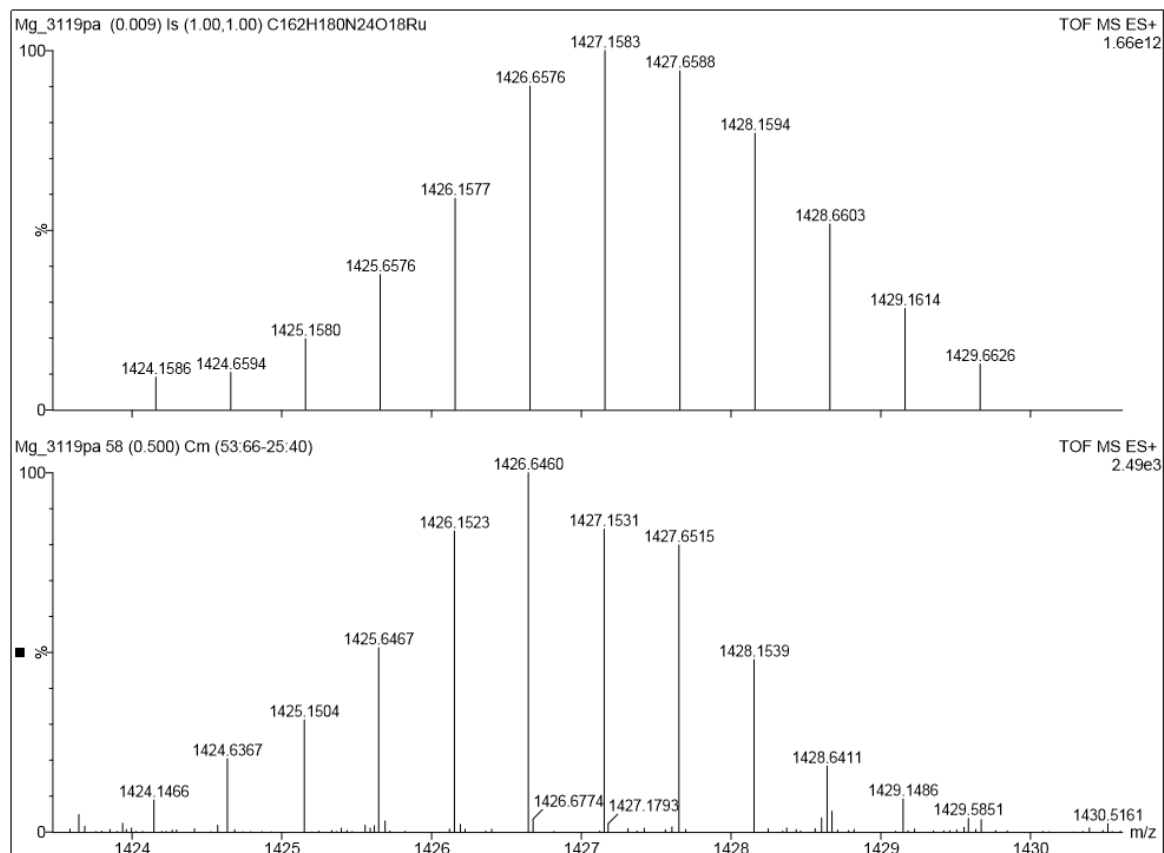

**Figure S37.** ESI-MS  $m/z$  traces of  $(\mathbf{R-L1B})_3\text{Ru}$  complex (bottom) and computed ESI-MS spectrum (top).

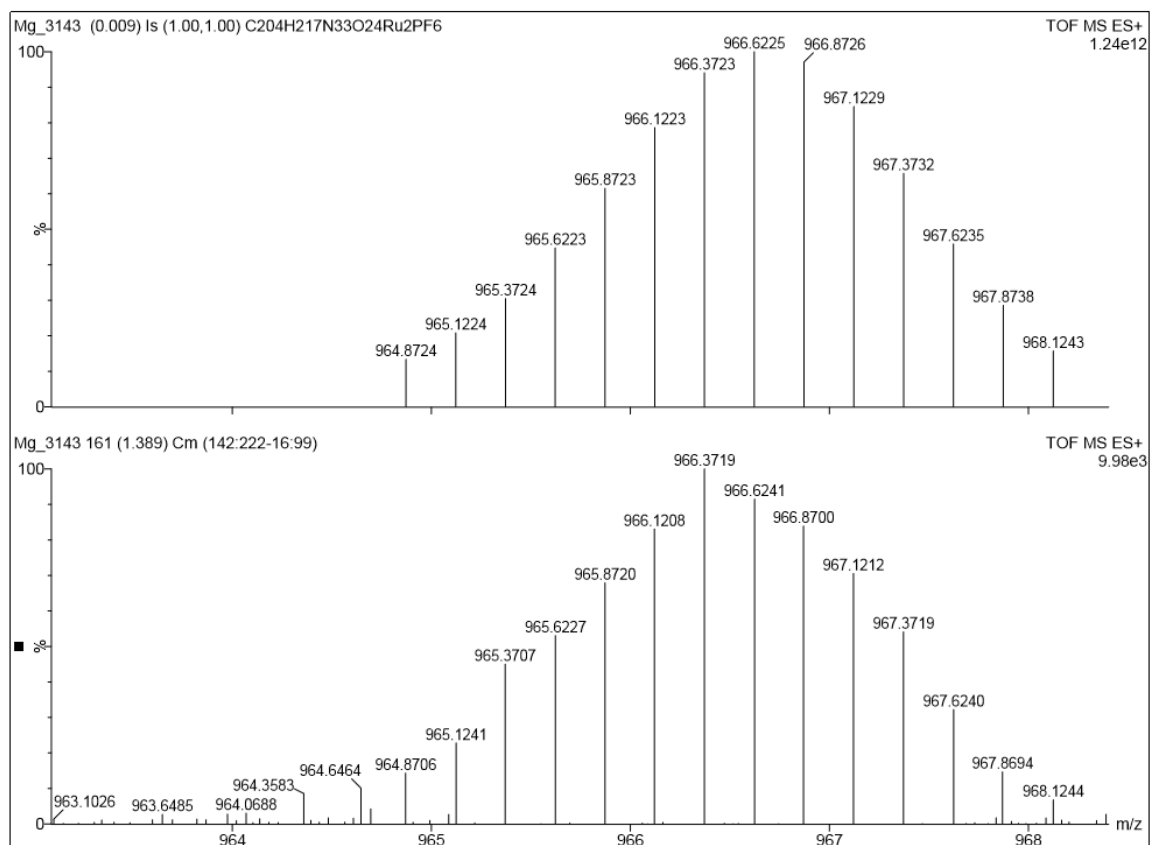

**Figure S38.** ESI-MS  $m/z$  traces of  $(\mathbf{R-L2B})_3\text{Ru}_2\text{-PF}_6$  complex (bottom) and computed ESI-MS spectrum (top).

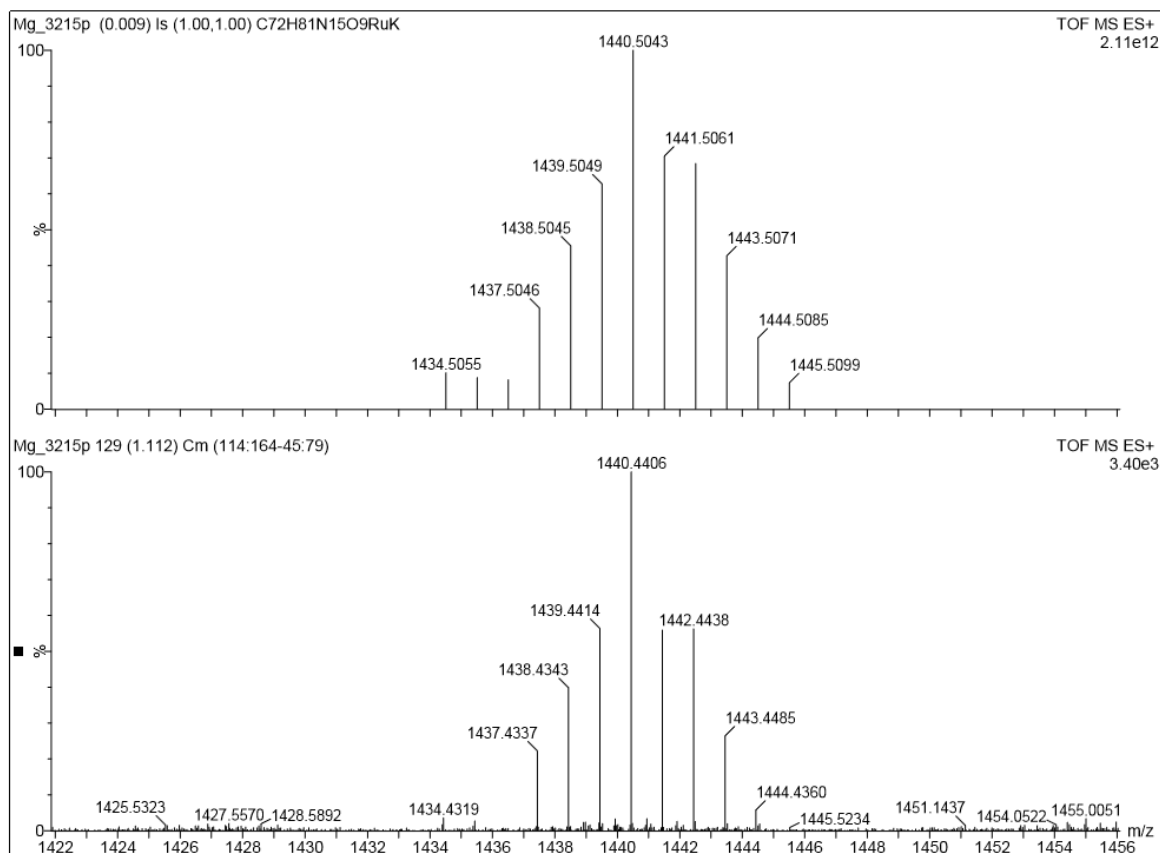

**Figure S39.** ESI-MS m/z traces of  $(\text{Di-L2B})_3\text{Ru}_2\text{-K}^+$  complex (bottom) and computed ESI-MS spectrum (top).

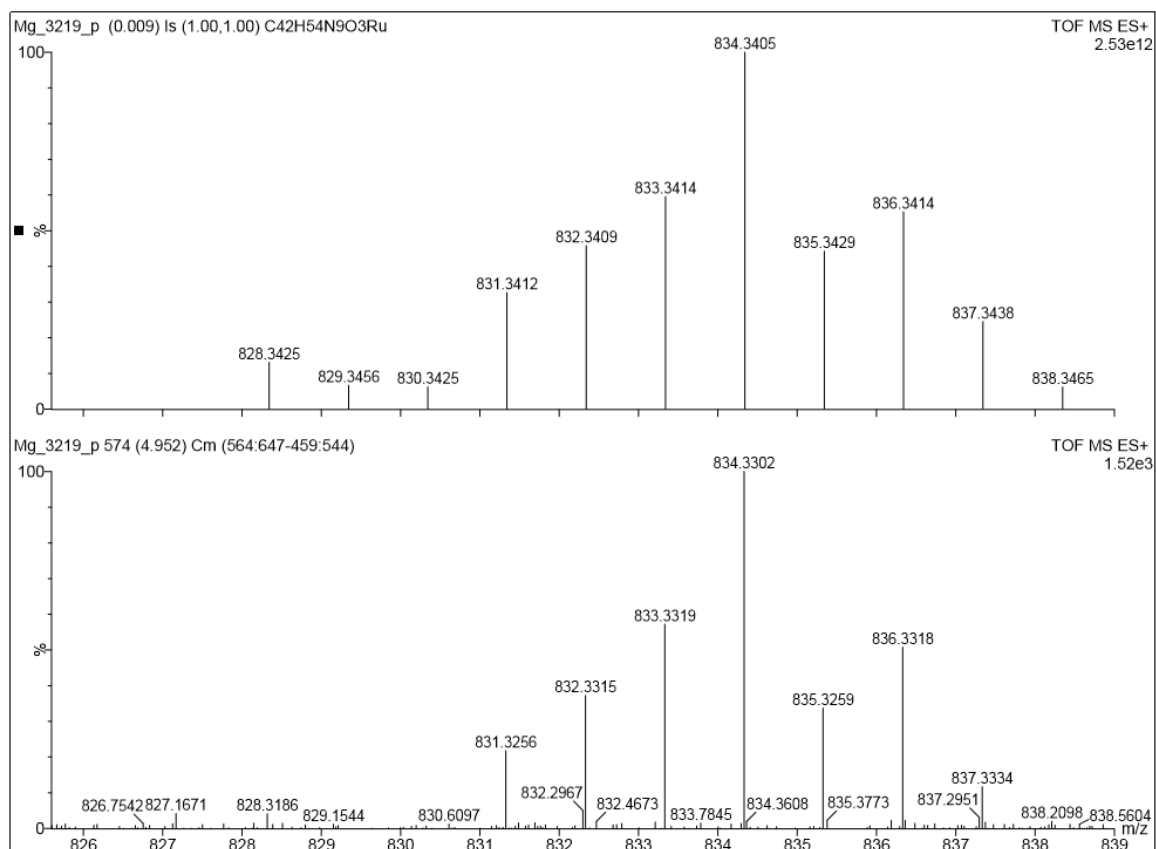

**Figure S40.** ESI-MS  $m/z$  traces of  $(\text{bp-DM})_3\text{Ru}_2$  complex (bottom) and computed ESI-MS spectrum (top).

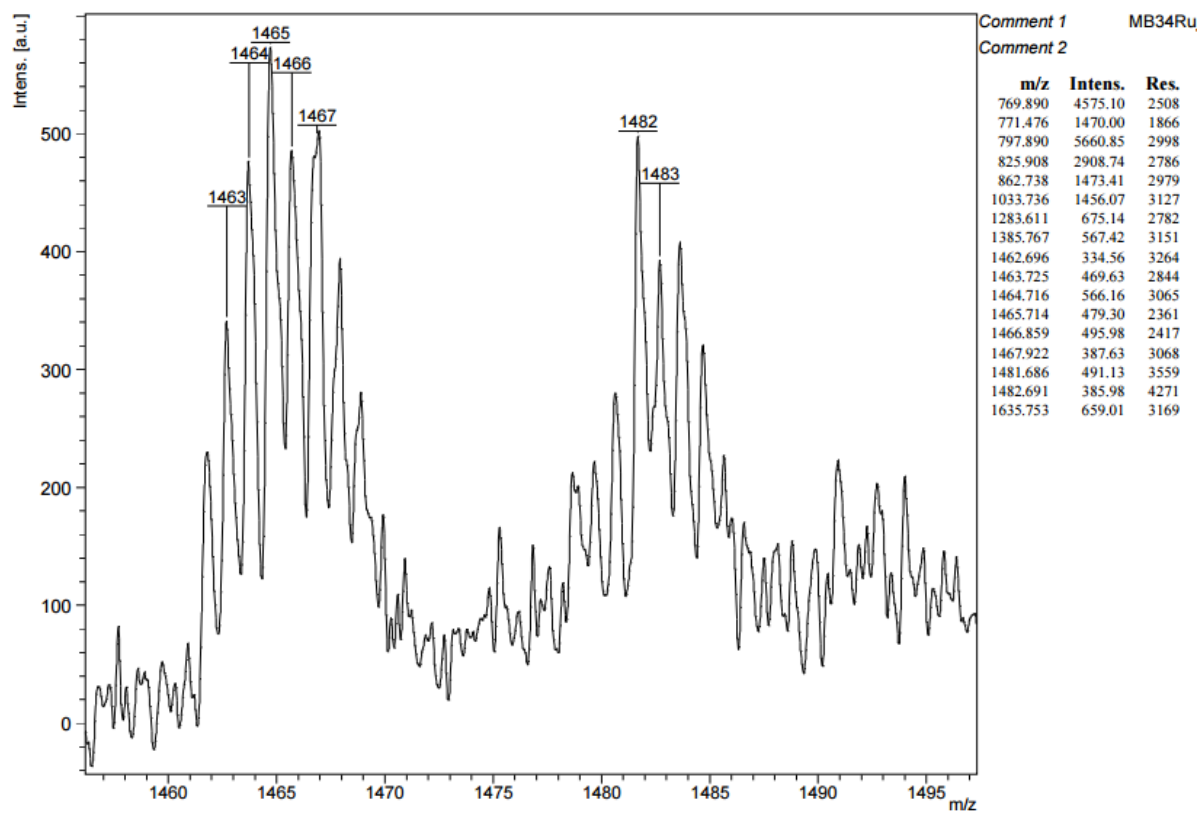

Figure S41. MALDI traces of (C3B)Ru complex.

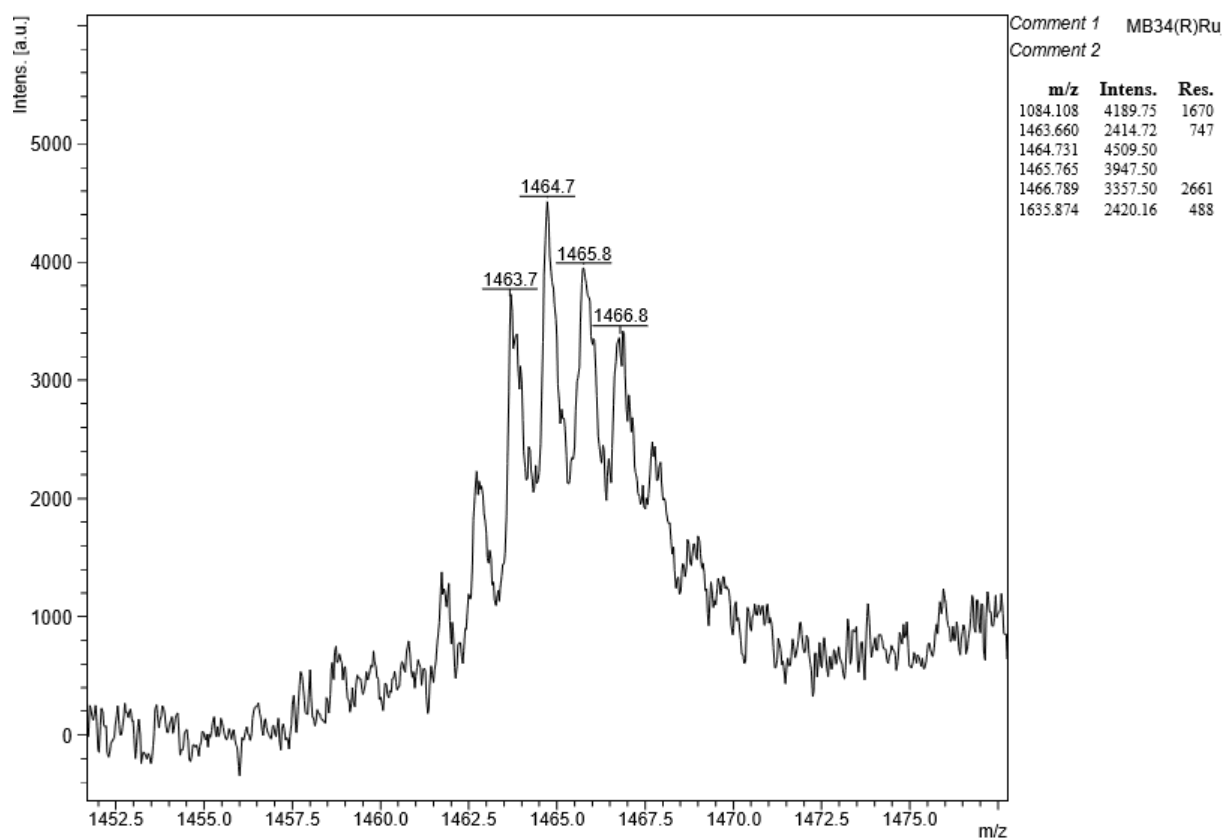

**Figure S42.** MALDI traces of (R-C3B)Ru complex.

## NMR

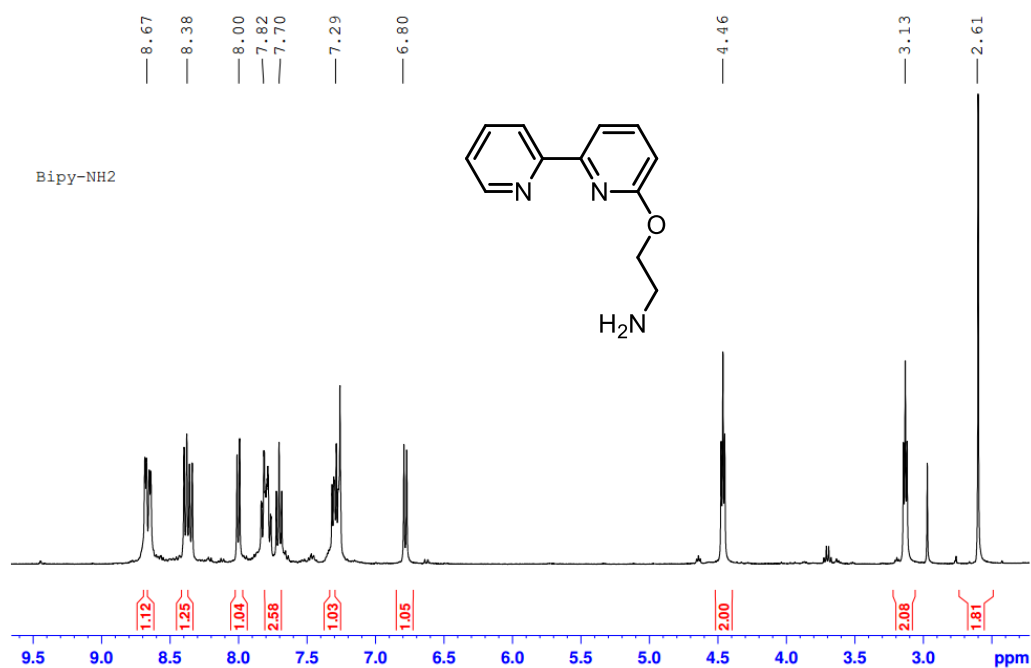

Figure S43. <sup>1</sup>H-NMR spectrum of the Nbp ligand.

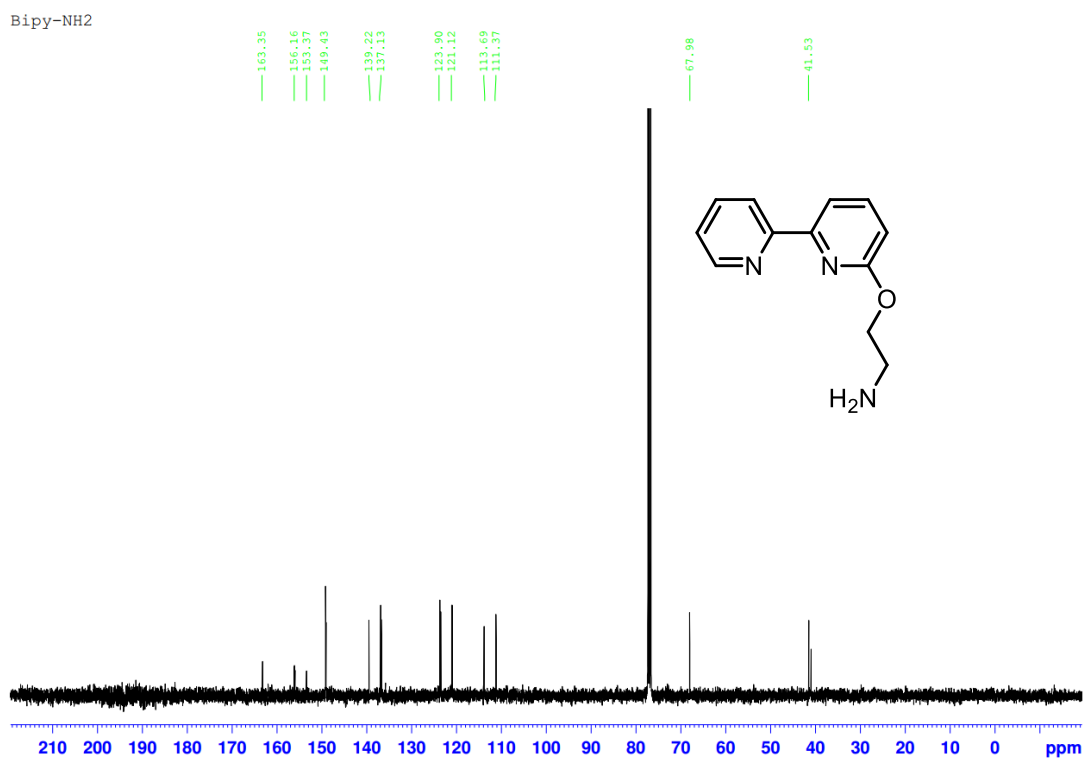

Figure S44. <sup>13</sup>C-NMR spectrum of the Nbp ligand.



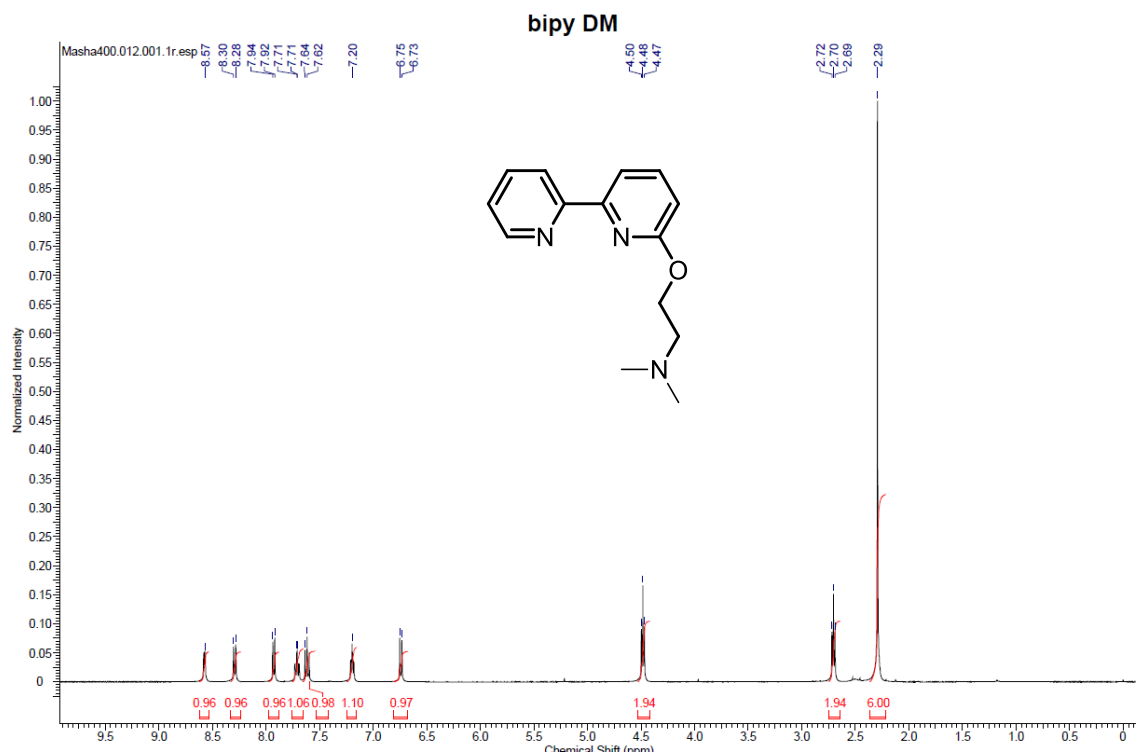

**Figure S45.**  $^1\text{H}$ -NMR spectrum of the bpDM ligand.

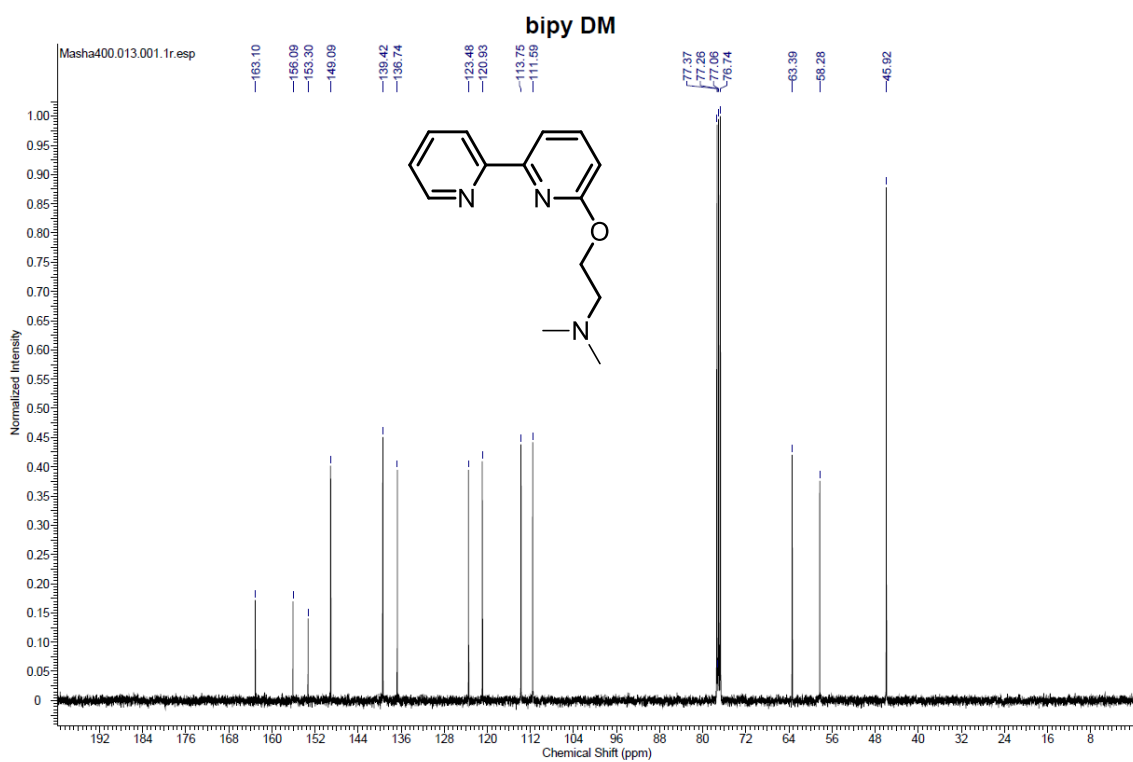

**Figure S46.**  $^{13}\text{C}$ -NMR spectrum of the bpDM ligand.
